# Supplementary material
Source: PubMed Central journal article supplement (PMC3103939)

*Supporting Information for*

**Chiral Calcium VAPOL-Phosphate Mediated Asymmetric Chlorination and Michael Reactions of 3-Substituted Oxindoles**

Wenhua Zheng, Zuhui Zhang, Matthew J. Kaplan, Jon C. Antilla\*

*Department of Chemistry, University of South Florida, Tampa, Florida 33620*

[\*jantilla@usf.edu\*](mailto:jantilla@usf.edu)

|                                                                    |         |
|--------------------------------------------------------------------|---------|
| General Considerations.....                                        | S2      |
| Catalyst Preparation.....                                          | S3-S4   |
| Catalyst/Solvent Screen for the Enantioselective Chlorination..... | S5      |
| General Procedure for Enantioselective Chlorination.....           | S6      |
| Characterization Data for Chlorination Products.....               | S6-S11  |
| General Procedure for Enantioselective Michael addition.....       | S12     |
| Characterization Data For Michael Addition Products.....           | S12-S14 |
| References.....                                                    | S14     |
| HPLC Spectra for <b>2a-2k</b> and <b>3a-3d</b> .....               | S15-S30 |
| NMR Spectra for <b>2a-2k</b> and <b>3a-3d</b> .....                | S31-S44 |

**General Considerations:** All reactions were carried out in flame-dried screw-cap test tubes with magnetic stirring. Toluene, diethyl ether, dichloromethane, and THF were purified by passing through a column of activated alumina under a dry argon atmosphere. Anhydrous *tert*-butyl methyl ether was commercially purchased and used without further purification. Ethyl acetate and isopropyl acetate were dried over 4Å MS. Substituted BINOL phosphoric acids were prepared from commercially available chiral BINOL. Oxindoles were prepared according to known literature procedures.<sup>[1]</sup>

Thin layer chromatography was performed on Merck TLC plates (silica gel 60 F254). Flash column chromatography was performed with Merck silica gel (230-400 mesh). Enantiomeric excess (*ee*) was determined using a Varian Prostar HPLC with a 210 binary pump and a 335 diode-array detector. Column conditions are reported in the experimental section below. Optical rotations were performed on a Rudolph Research Analytical Autopol IV polarimeter ( $\lambda$ 589) using a 700- $\mu$ L cell with a path length of 1-dm. Melting points were determined using a MEL-TEMP 3.0 instrument and are uncorrected. <sup>1</sup>H NMR and <sup>13</sup>C NMR were recorded on a Bruker Avance DPX-250 (250 MHz for <sup>1</sup>H and 62.5 MHz for <sup>13</sup>C) instrument. <sup>31</sup>P NMR were recorded on a Varian Unity Inova 400 (162 MHz for <sup>31</sup>P). <sup>1</sup>H and <sup>13</sup>C chemical shifts are reported in ppm downfield from tetramethylsilane (TMS). H<sub>3</sub>PO<sub>4</sub> was used as an external standard for <sup>31</sup>P ( $\sigma$ : 0.00 ppm). The HRMS data were measured on an Agilent 1100 LC/MS ESI/TOF mass spectrometer with electrospray ionization. Compounds described in the literature were characterized by comparing their spectral data to the reported values. The absolute configuration of compound **2a** was determined to be “(S)” by comparison of the optical rotation value to the reported literature value.<sup>3</sup> The absolute configuration of compounds **3a-3d** was determined to be “(S)” by comparison of the observed optical rotation values to the reported literature values.<sup>4</sup>

## Catalyst Preparation

**“(R) or (S)-PA1 (VAPOL-PA) purified on silica gel” (Table 1, entries 2-6):** was prepared according to the reported literature procedure.<sup>2</sup>

**“PA1 (VAPOL-PA) washed with HCl”(Table 1, entry 8):** Prepared in a similar manner to the reported literature procedure<sup>[2]</sup> but not purified by silica gel column chromatography. The crude (R) or (S)-VAPOL phosphoric acid was precipitated from EtOH with 6 N HCl. The resulting white solid was filtered, and dried overnight under high vacuum to afford acidified chiral VAPOL-PA. The <sup>1</sup>H NMR of the title compound is identical to **“PA1 (VAPOL-PA) purified on silica gel.”**

**Catalysts M[P1]<sub>n</sub>:** For Na[P1] (Table 1, entry 9), K[P1] (Table 1, entry 10), Mg[P1]<sub>2</sub> (Table 1, entry 11), Ca[P1]<sub>2</sub>(Table 1, entries 12 and 15, Table 2, Figure 2), Sr[P1]<sub>2</sub>(Table 1, entry 13), or Ba[P1]<sub>2</sub>(Table 1, entry 14), NaOMe (1.0 equiv), KOtBu (1.0 equiv), Mg(OtBu)<sub>2</sub> (0.5 equiv), Ca(OMe)<sub>2</sub> (0.5 equiv), Sr(OiPr)<sub>2</sub> (0.5 equiv) or Ba(OtBu)<sub>2</sub> (0.5 equiv) was combined with **“PA1 (VAPOL-PA) washed with HCl”** (1.0 equiv) in a flame-dried Schlenk tube, under an argon atmosphere. MeOH was added (0.05 M) and the resulting mixture was stirred at room temperature for 1 h. The solvent was removed under high vacuum to afford the desired **M[P1]<sub>n</sub>** as a white solid, which was used directly without further purification. The <sup>1</sup>H NMR of these compounds is the same as **“PA1 (VAPOL-PA) purified on silica gel.”**

**Procedure for the preparation of Ca[(S)-VAPOL-Phosphate]<sub>2</sub>:** A flame-dried flask was charged with **“PA1 (VAPOL-PA) washed with HCl”** (60.0mg, 0.1 mmol) and Ca(OMe)<sub>2</sub> (5.1 mg, 0.05 mmol). Methanol (5 mL) was added and the resulting mixture was stirred at room temperature for 1 h. The solvent was removed under high vacuum to afford Ca[(S)-VAPOL-Phosphate]<sub>2</sub> as a pale yellow solid. <sup>1</sup>H NMR (400 MHz, d<sub>6</sub>-DMSO) δ 9.96 (d, *J* = 8.4 Hz, 4H), 8.03 (d, *J* = 7.2 Hz, 4H), 7.88 (dd, *J* = 16.8, 8.8 Hz, 8H), 7.74-7.67 (m, 8H), 7.54 (s, 4H), 7.09 (t, *J* = 7.2 Hz, 4H), 6.94 (t, *J* = 7.2 Hz, 8H), 6.44 (d, *J* = 7.2 Hz, 8H); <sup>13</sup>C NMR (100 MHz, d<sub>6</sub>-DMSO) δ 140.5, 139.8, 133.7, 132.7, 129.8, 128.9, 128.8, 128.2, 128.0, 127.4, 127.2, 127.0, 126.6, 126.3, 124.8, 121.6(two C not located). <sup>31</sup>P NMR (162 MHz, d<sub>6</sub>-DMSO) δ 1.05.

$^1\text{H}$  NMR of  $\text{Ca}[(R)\text{-VAPOL-Phosphate}]_2$

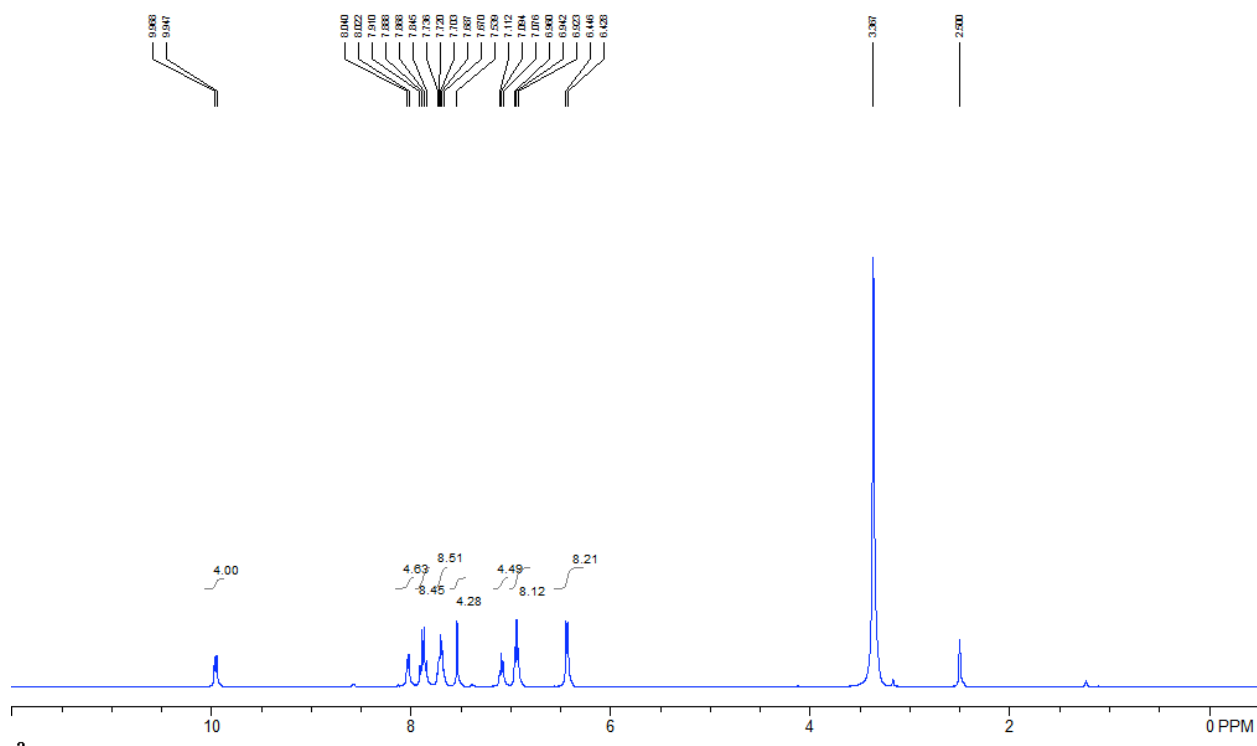

$^{13}\text{C}$  NMR of  $\text{Ca}[(R)\text{-VAPOL-Phosphate}]_2$

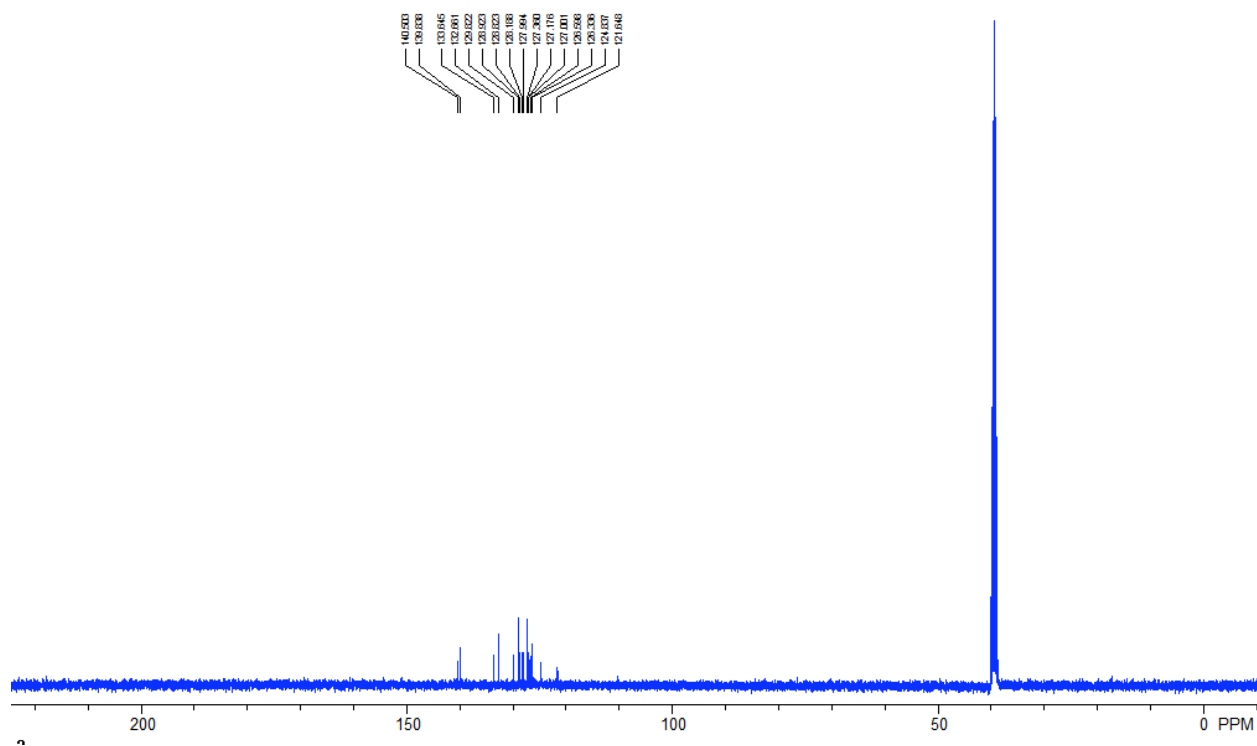

## Preliminary Catalyst/Solvent Screening for the Enantioselective Chlorination of Oxindoles

(Catalysts are purified by silica gel column)

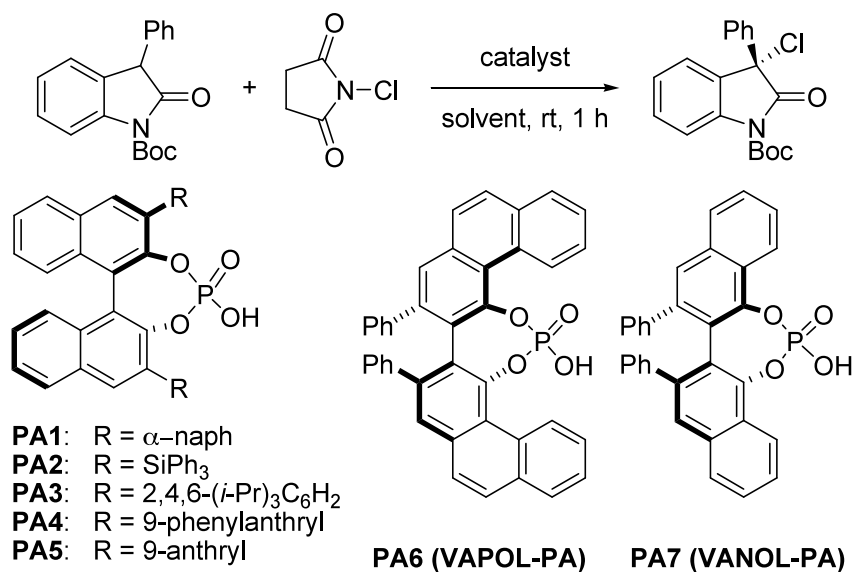

| entry          | catalyst   | solvent         | conversion (%) <sup>b</sup> | ee (%) <sup>c</sup> |
|----------------|------------|-----------------|-----------------------------|---------------------|
| 1 <sup>d</sup> | —          | toluene         | < 20                        | —                   |
| 2              | <b>PA1</b> | toluene         | 99                          | 6                   |
| 3              | <b>PA2</b> | toluene         | 99                          | 6                   |
| 4              | <b>PA3</b> | toluene         | 99                          | 1                   |
| 5              | <b>PA4</b> | toluene         | 99                          | 16                  |
| 6              | <b>PA6</b> | toluene         | 99                          | 51                  |
| 7              | <b>PA6</b> | DCM             | 99                          | 48                  |
| 8              | <b>PA6</b> | EtOAc           | 99                          | 50                  |
| 9              | <b>PA6</b> | benzene         | 99                          | 60                  |
| 10             | <b>PA5</b> | benzene         | 99                          | 18                  |
| 11             | <b>PA7</b> | benzene         | 99                          | 2                   |
| 12             | <b>PA6</b> | <i>i</i> -PrOAc | 99                          | 80                  |

<sup>a</sup> Reaction Conditions: oxindole (0.05 mmol, 1.0 equiv), NCS (0.06 mmol, 1.2 equiv), 5 mol % catalyst in solvent (0.5 mL, 0.1 M). <sup>b</sup> Isolated yield. <sup>c</sup> Enantiomeric excess determined by chiral HPLC analysis. <sup>d</sup> After 24 h.

### General procedure for the enantioselective chlorination of oxindoles:

To a flame-dried test tube was added oxindole **1** (0.05 mmol, 1.0 equiv) and Ca[(*S*)-VAPOL-Phosphate]<sub>2</sub> (2.5 mol %, 1.5 mg). The atmosphere was exchanged with argon three times and isopropyl acetate (1.0 mL) was added. After stirring for 10 min, NCS (0.12 M solution in isopropyl acetate) was added to the mixture of oxindole and catalyst over a period of 20 min. After stirring for an additional 10 min, the reaction mixture was purified directly by silica gel column chromatography (eluent: Hexane / EtOAc = 20/1) to yield product **2**. The *ee* of product **2** was determined by chiral HPLC analysis.

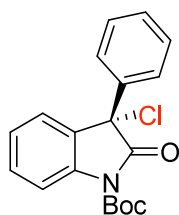

**tert-butyl 3-chloro-2-oxo-3-phenylindoline-1-carboxylate (2a)**<sup>3</sup>: 99% yield, 94% *ee*.

Enantiomeric excess was determined by chiral HPLC analysis (Chiralcel OJ-H, 0.3 mL/min, 90:10 hexanes/*i*PrOH):*t*<sub>R</sub>(major) = 23.92 min, *t*<sub>R</sub>(minor) = 32.21 min.  $[\alpha]_D^{20} = +99.16^\circ$  (*c* = 0.508, CHCl<sub>3</sub>) Lit:  $[\alpha]_D^{20} = -81.9^\circ$  (*c* = 0.18, CHCl<sub>3</sub>, (*R*)-isomer)<sup>3</sup>. <sup>1</sup>H NMR (250 MHz, CDCl<sub>3</sub>)  $\delta$  7.91 (d, *J* = 8.25 Hz, 1H), 7.46-7.18 (m, 8H), 1.55 (s, 9H). <sup>13</sup>C NMR (62.5 MHz, CDCl<sub>3</sub>)  $\delta$  171.0, 149.0, 139.1, 136.4, 130.8, 129.2, 128.9, 128.6, 127.9, 126.5, 125.4, 115.7, 85.2, 66.6, 28.0. HRMS (ESI) calcd for ([M+Na]<sup>+</sup>) 366.0867, found 366.0872.

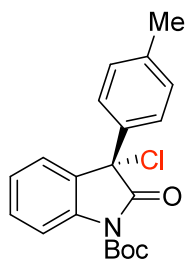

**tert-butyl 3-chloro-2-oxo-3-p-tolylindoline-1-carboxylate (2b)**: 99% yield, 93% *ee*.

Enantiomeric excess was determined by chiral HPLC analysis (Chiralcel OJ-H, 0.5 mL/min, 90:10 hexanes/*i*PrOH):*t*<sub>R</sub>(major) = 14.63 min, *t*<sub>R</sub>(minor) = 28.28 min;  $[\alpha]_D^{20} = +78.744^\circ$  (*c* = 0.43,

CHCl<sub>3</sub>). <sup>1</sup>H NMR (250 MHz, CDCl<sub>3</sub>) δ 7.90 (dt, *J* = 7.75, 1.0 Hz, 1H), 7.38-7.18 (m, 5H), 7.09 (d, *J* = 7.75 Hz, 2H), 2.28 (s, 3H), 1.54 (s, 9H). <sup>13</sup>C NMR (62.5 MHz, CDCl<sub>3</sub>) δ 171.0, 149.0, 139.3, 139.1, 133.4, 130.7, 129.3, 129.0, 127.8, 126.1, 125.4, 115.6, 85.1, 66.5, 28.0, 21.1. HRMS (ESI) calcd for ([M-Boc-Cl+H]<sup>+</sup>) 222.0913, found 222.0909.

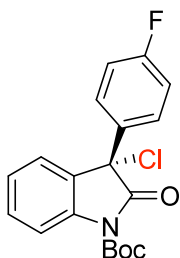

**tert-butyl 3-chloro-3-(4-fluorophenyl)-2-oxoindoline-1-carboxylate (2c):** 99% yield, 96% *ee*. Enantiomeric excess was determined by chiral HPLC analysis (Chiralcel OJ-H, 0.3 mL/min, 90:10 hexanes/*i*PrOH):*t*<sub>R</sub>(major) = 21.48 min, *t*<sub>R</sub>(minor) = 24.11 min. [α]<sup>20</sup><sub>D</sub> = +122.21° (*c* = 0.59, CHCl<sub>3</sub>). <sup>1</sup>H NMR (250 MHz, CDCl<sub>3</sub>) δ 7.91 (d, *J* = 8.25 Hz, 1H), 7.45-7.34 (m, 4H), 7.25-7.18 (m, 1H), 6.97 (t, *J* = 8.25 Hz, 2H), 1.55 (s, 9H). <sup>13</sup>C NMR (62.5 MHz, CDCl<sub>3</sub>) δ 170.8, 165.2, 161.2, 148.9, 139.1, 132.2, 132.2, 131.0, 130.2, 130.0, 128.5, 126.1, 125.5, 115.8, 115.7, 115.4, 85.3, 65.9, 28.0. HRMS (ESI) calcd for ([M+Na]<sup>+</sup>) 384.0773, found 384.0764.

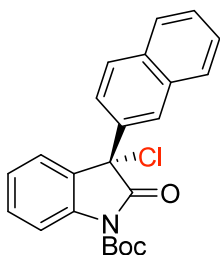

**tert-butyl 3-chloro-3-(naphthalen-2-yl)-2-oxoindoline-1-carboxylate (2d):** 99% yield, >99% *ee*. Enantiomeric excess was determined by chiral HPLC analysis (Chiralcel OJ-H, 0.3 mL/min, 90:10 hexanes/*i*PrOH):*t*<sub>R</sub>(major) = 26.85 min, *t*<sub>R</sub>(minor) = 29.52 min. [α]<sup>20</sup><sub>D</sub> = +63.36° (*c* = 0.49, CHCl<sub>3</sub>). <sup>1</sup>H NMR (250 MHz, CDCl<sub>3</sub>) δ 7.97-7.91 (m, 1H), 7.82-7.66 (m, 5H), 7.45-7.38 (m, 4H), 7.25 (dt, *J* = 8.25, 1.0 Hz, 1H), 1.55 (s, 9H). <sup>13</sup>C NMR (62.5 MHz, CDCl<sub>3</sub>) δ 170.9, 149.0, 139.2, 133.6, 133.3, 132.5, 130.9, 128.9, 128.8, 128.5, 127.6, 127.3, 127.2, 126.7, 126.2, 125.5, 125.2, 115.7, 85.2, 66.8, 28.0. HRMS (ESI) calcd for ([M-Boc-Cl+H]<sup>+</sup>) 258.0913, found 258.0911.

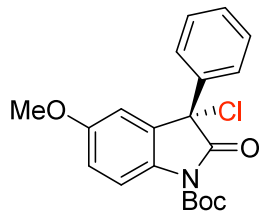

**tert-butyl 3-chloro-5-methoxy-2-oxo-3-phenylindoline-1-carboxylate (2e):** 99% yield, 90% *ee*. Enantiomeric excess was determined by chiral HPLC analysis (Chiralcel OJ-H, 0.5 mL/min, 90:10 hexanes/*i*PrOH):  $t_R(\text{major}) = 26.09$  min,  $t_R(\text{minor}) = 19.05$  min.  $[\alpha]_D^{20} = +107.48^\circ$  ( $c = 0.593$ ,  $\text{CHCl}_3$ ).  $^1\text{H NMR}$  (250 MHz,  $\text{CDCl}_3$ )  $\delta$  7.82 (d,  $J = 8.25$  Hz, 1H), 7.45-7.41 (m, 2H), 7.31-7.27 (m, 3H), 6.92-6.87 (m, 2H), 3.72 (d,  $J = 1.0$  Hz, 3H), 1.53 (d,  $J = 1$  Hz, 9H).  $^{13}\text{C NMR}$  (62.5 MHz,  $\text{CDCl}_3$ )  $\delta$  171.1, 157.4, 149.1, 136.3, 132.4, 130.0, 129.2, 128.6, 127.9, 116.8, 116.4, 111.3, 85.0, 66.9, 55.8, 31.6, 28.0. HRMS (ESI) calcd for  $([\text{M}-\text{Boc}-\text{Cl}]^+)$  237.0784, found 222.0779.

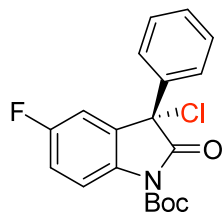

**tert-butyl 3-chloro-5-fluoro-2-oxo-3-phenylindoline-1-carboxylate (2f):** 99% yield, 93% *ee*. Enantiomeric excess was determined by chiral HPLC analysis (Chiralcel OJ-H, 0.3 mL/min, 90:10 hexanes/*i*PrOH):  $t_R(\text{major}) = 25.39$  min,  $t_R(\text{minor}) = 20.11$  min.  $[\alpha]_D^{20} = +92.715^\circ$  ( $c = 0.4225$ ,  $\text{CHCl}_3$ ).  $^1\text{H NMR}$  (250 MHz,  $\text{CDCl}_3$ )  $\delta$  7.92 (dq,  $J = 4.0, 1.0$  Hz, 1H), 7.44-7.39 (m, 2H), 7.33-7.26 (m, 3H), 7.12-7.04 (m, 2H), 1.54 (s, 9H).  $^{13}\text{C NMR}$  (62.5 MHz,  $\text{CDCl}_3$ )  $\delta$  170.6, 162.1, 158.2, 148.9, 135.8, 135.1, 135.1, 130.7, 130.5, 129.4, 128.7, 127.7, 117.8, 117.4, 117.3, 117.2, 113.5, 113.1, 85.4, 66.2, 28.0. HRMS (ESI) calcd for  $([\text{M}+\text{Na}]^+)$  384.0773, found 384.0767.



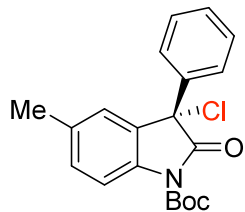

**tert-butyl 3-chloro-5-methyl-2-oxo-3-phenylindoline-1-carboxylate (2g):** 99% yield, 86% *ee*. Enantiomeric excess was determined by chiral HPLC analysis (*S,S*)-Whelk-O1, 1.0 mL/min, 90:10 hexanes/*i*PrOH): $t_R$ (major) = 11.61 min,  $t_R$ (minor) = 8.19 min.  $[\alpha]_D^{20} = +96.145^\circ$  ( $c = 0.48$ , CHCl<sub>3</sub>). <sup>1</sup>H NMR (250 MHz, CDCl<sub>3</sub>)  $\delta$  7.77 (d,  $J = 8.25$  Hz, 1H), 7.46-7.42 (m, 2H), 7.32-7.28 (m, 3H), 7.19-7.15 (m, 2H), 2.30 (s, 3H), 1.54 (s, 9H). <sup>13</sup>C NMR (62.5 MHz, CDCl<sub>3</sub>)  $\delta$  171.1, 149.0, 136.8, 136.5, 135.3, 131.4, 129.1, 128.9, 128.6, 127.9, 126.4, 115.5, 85.0, 66.9, 28.1, 21.1. HRMS (ESI) calcd for ([M+Na]<sup>+</sup>)384.0773, found 384.0765.

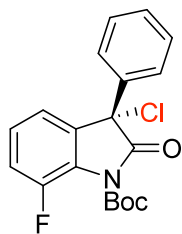

**tert-butyl 3-chloro-7-fluoro-2-oxo-3-phenylindoline-1-carboxylate (2h):** 99% yield, 97% *ee*. Enantiomeric excess was determined by chiral HPLC analysis (*S,S*)-Whelk-O1, 1.0 mL/min, 90:10 hexanes/*i*PrOH): $t_R$ (major) = 12.11 min,  $t_R$ (minor) = 9.65 min.  $[\alpha]_D^{20} = +86.923^\circ$  ( $c = 0.603$ , CHCl<sub>3</sub>). <sup>1</sup>H NMR (250 MHz, CDCl<sub>3</sub>)  $\delta$  7.43-7.39 (m, 2H), 7.28-7.26 (m, 3H), 7.16-7.10 (m, 3H), 1.51 (s, 9H). <sup>13</sup>C NMR (62.5 MHz, CDCl<sub>3</sub>)  $\delta$  170.6, 150.6, 147.1, 146.6, 135.8, 132.2, 132.1, 129.4, 128.7, 127.7, 126.5, 126.4, 126.2, 126.0, 122.0, 121.9, 119.0, 118.7, 85.9, 66.5, 66.5, 27.7. HRMS (ESI) calcd for ([M+Na]<sup>+</sup>)384.0773, found 384.0765.

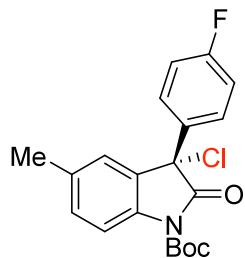

**tert-butyl 3-chloro-3-(4-fluorophenyl)-5-methyl-2-oxindoline-1-carboxylate (2i):** 99% yield, 92% *ee*. Enantiomeric excess was determined by chiral HPLC analysis ((*S,S*)-Whelk-O1, 1.0 mL/min, 90:10 hexanes/*i*PrOH):  $t_R(\text{major}) = 10.61$  min,  $t_R(\text{minor}) = 6.69$  min.  $[\alpha]_D^{20} = +97.025^\circ$  ( $c = 0.825$ ,  $\text{CHCl}_3$ ).  $^1\text{H NMR}$  (250 MHz,  $\text{CDCl}_3$ )  $\delta$  7.78 (d,  $J = 8.5$  Hz, 1H), 7.41 (dd,  $J = 7.0$ , 1.75 Hz, 2H), 7.20-7.15 (m, 2H), 6.97 (t,  $J = 8.5$  Hz, 2H), 2.31 (s, 3H), 1.54 (s, 9H).  $^{13}\text{C NMR}$  (62.5 MHz,  $\text{CDCl}_3$ )  $\delta$  171.0, 170.9, 165.1, 161.2, 149.0, 136.7, 135.4, 132.4, 132.3, 131.6, 130.1, 130.0, 128.5, 126.4, 115.7, 115.6, 115.3, 85.1, 66.2, 28.0, 21.1. HRMS (ESI) calcd for ( $[\text{M-Boc-Cl}+\text{H}]^+$ ) 240.0819, found 240.0815.

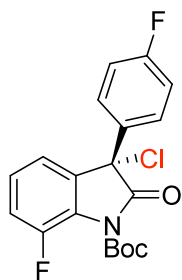

**tert-butyl 3-chloro-7-fluoro-3-(4-fluorophenyl)-2-oxindoline-1-carboxylate (2j):** 99% yield, 98% *ee*. Enantiomeric excess was determined by chiral HPLC analysis (Chiralcel OJ-H, 1.0 mL/min, 90:10 hexanes/*i*PrOH):  $t_R(\text{major}) = 9.80$  min,  $t_R(\text{minor}) = 22.64$  min.  $[\alpha]_D^{20} = +72.642^\circ$  ( $c = 0.675$ ,  $\text{CHCl}_3$ ).  $^1\text{H NMR}$  (250 MHz,  $\text{CDCl}_3$ )  $\delta$  7.42 (dd,  $J = 9.0$ , 5.0 Hz, 2H), 7.20-7.13 (m, 3H), 6.98 (t,  $J = 8.25$  Hz, 2H), 1.53 (s, 9H).  $^{13}\text{C NMR}$  (62.5 MHz,  $\text{CDCl}_3$ )  $\delta$  170.4, 170.4, 166.3, 161.3, 150.6, 147.0, 146.6, 131.7, 131.7, 131.6, 131.6, 126.6, 126.5, 126.2, 126.0, 121.9, 121.9, 119.2, 118.9, 115.9, 115.5, 86.0, 65.7, 65.7, 27.7, 27.7. HRMS (ESI) calcd for ( $[\text{M}+\text{Na}]^+$ ) 402.0679, found 402.0674.

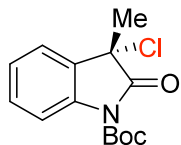

**tert-butyl 3-chloro-3-methyl-2-oxoindoline-1-carboxylate (2k):** 99% yield, 62% *ee*.

Enantiomeric excess was determined by chiral HPLC analysis (Chiralcel OJ-H, 0.3 mL/min, 90:10 hexanes/*i*PrOH):  $t_R(\text{major}) = 21.73$  min,  $t_R(\text{minor}) = 23.61$  min.  $[\alpha]_D^{20} = +30.143^\circ$  ( $c = 0.48$ ,  $\text{CHCl}_3$ ).  $^1\text{H NMR}$  (250 MHz,  $\text{CDCl}_3$ )  $\delta$  7.97-7.91 (m, 1H), 7.82-7.66 (m, 5H), 7.45-7.38 (m, 4H), 7.25 (dt,  $J = 8.25, 1.0$  Hz, 1H), 1.55 (s, 9H).  $^{13}\text{C NMR}$  (62.5 MHz,  $\text{CDCl}_3$ )  $\delta$  170.9, 149.0, 139.2, 133.6, 133.3, 132.5, 130.9, 128.9, 128.8, 128.5, 127.6, 127.3, 127.2, 126.7, 126.2, 125.5, 125.2, 115.7, 85.2, 66.8, 28.0. HRMS (ESI) calcd for  $([\text{M}+\text{Na}]^+)$  304.0711, found 304.0708.

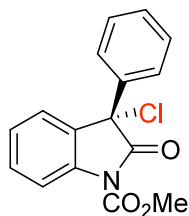

**methyl 3-chloro-2-oxo-3-phenylindoline-1-carboxylate (2l):** 99% yield, 97% *ee*.

Enantiomeric excess was determined by chiral HPLC analysis (*(S, S)*-Whelk-O1, 1.0 mL/min, 90:10 hexanes/*i*PrOH):  $t_R(\text{major}) = 17.36$  min,  $t_R(\text{minor}) = 13.93$  min.  $[\alpha]_D^{20} = +116.55^\circ$  ( $c = 0.77$ ,  $\text{CHCl}_3$ ).  $^1\text{H NMR}$  (250 MHz,  $\text{CDCl}_3$ )  $\delta$  7.94 (d,  $J = 8.0$  Hz, 1H), 7.42-7.20 (m, 8H), 3.89 (s, 3H).  $^{13}\text{C NMR}$  (62.5 MHz,  $\text{CDCl}_3$ )  $\delta$  170.9, 151.2, 138.6, 136.2, 133.9, 129.3, 129.1, 128.7, 127.8, 126.2, 125.8, 115.7, 85.2, 66.6, 54.3. HRMS (ESI) calcd for  $([\text{M}+\text{H}]^+)$  302.0579, found 304.0574.

### General procedure for the enantioselective Michael reaction of oxindoles:

To a flame-dried test tube was added oxindole **1** (0.05 mmol, 1.0 equiv) and Ca[(*R*)-VAPOL-Phosphate]<sub>2</sub> (2.5 mol %, 1.5 mg). The atmosphere was exchanged with argon three times and isopropyl acetate (0.5 mL) was added. The mixture was cooled to 0 °C, and methyl vinyl ketone (12.3 μl, 3.0 equiv) was added. The reaction was continued at 0 °C, and upon completion purified directly by silica gel column chromatography (eluent: Hexane / EtOAc = 5/1) to yield product **3**. The *ee* of product **3** was determined by chiral HPLC analysis.

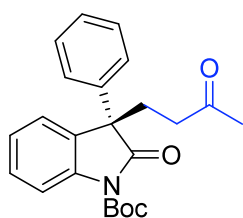

**(S)-tert-butyl 2-oxo-3-(3-oxobutyl)-3-phenylindoline-1-carboxylate (3a)**: 97% yield, 90% *ee*. Enantiomeric excess was determined by chiral HPLC analysis (Chiralpak AD-H, 1.0 mL/min, 94:6 hexanes/*i*PrOH):  $t_R$ (major) = 7.95 min,  $t_R$ (minor) = 10.89 min.  $[\alpha]_D^{20} = -53.94^\circ$  ( $c = 0.71$ , CHCl<sub>3</sub>) Lit:  $[\alpha]_D^{20} = -62.02^\circ$  ( $c = 1.00$ , CHCl<sub>3</sub>, (*S*)-isomer). <sup>1</sup>H NMR (250 MHz, CDCl<sub>3</sub>) δ 7.87 (d,  $J = 8.0$  Hz, 1H), 7.34-7.12 (m, 8H), 2.74-2.62 (m, 1H), 2.47-2.17 (m, 2H), 2.09-1.96 (m, 1H), 1.94 (s, 3H), 1.56 (s, 9H). The spectral data are identical to those in reference 4.

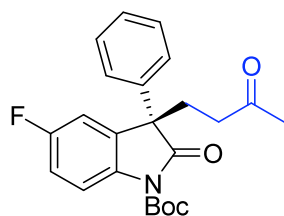

**(S)-tert-butyl 5-fluoro-2-oxo-3-(3-oxobutyl)-3-phenylindoline-1-carboxylate (3b)**: 96% yield, 95% *ee*. Enantiomeric excess was determined by chiral HPLC analysis (Chiralpak AD-H, 1.0 mL/min, 94:6 hexanes/*i*PrOH):  $t_R$ (major) = 6.71 min,  $t_R$ (minor) = 7.87 min.  $[\alpha]_D^{20} = -58.64^\circ$  ( $c = 0.675$ , CHCl<sub>3</sub>); <sup>1</sup>H NMR (250 MHz, CDCl<sub>3</sub>) δ 7.88 (dd,  $J = 9.0, 4.5$  Hz, 2H), 7.29-7.19 (m, 5H), 7.00 (dt,  $J = 9.0, 2.75$  Hz, 1H), 6.83 (dd,  $J = 7.75, 2.5$  Hz, 1H), 2.73-2.63 (m, 1H), 2.44-2.23 (m,

2H), 2.12-2.02 (m, 1H), 1.97 (s, 3H), 1.55 (s, 9H). The spectra data are identical to those in reference 4.

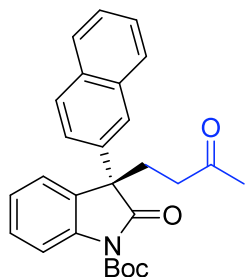

**(S)-tert-butyl 3-(naphthalen-2-yl)-2-oxo-3-(3-oxobutyl)indoline-1-carboxylate (3c):** 95% yield, 95% *ee*. Enantiomeric excess was determined by chiral HPLC analysis (Chiralpak AD-H, 1.0 mL/min, 94:6 hexanes/*i*PrOH):  $t_R(\text{major}) = 9.48$  min,  $t_R(\text{minor}) = 14.11$  min  $[\alpha]_D^{20} = -22.195^\circ$  ( $c = 0.925$ ,  $\text{CHCl}_3$ ).  $^1\text{H NMR}$  (250 MHz,  $\text{CDCl}_3$ )  $\delta$  7.91 (d,  $J = 8.0$  Hz, 1H), 7.72-7.65 (m, 4H), 7.40-7.34 (m, 4H), 7.18-7.15 (m, 2H), 2.86-2.75 (m, 1H), 2.58-2.28 (m, 2H), 2.12-1.99 (m, 1H), 1.95 (s, 3H), 1.56 (s, 9H). The spectral data are identical to those in reference 4.

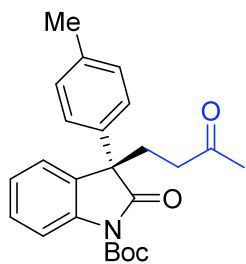

**(S)-tert-butyl 2-oxo-3-(3-oxobutyl)-3-p-tolylindoline-1-carboxylate (3d):** 96% yield, 90% *ee*. Enantiomeric excess was determined by chiral HPLC analysis (Chiralpak AD-H, 1.0 mL/min, 94:6 hexanes/*i*PrOH):  $t_R(\text{major}) = 7.49$  min,  $t_R(\text{minor}) = 11.25$  min.  $[\alpha]_D^{20} = -47.31^\circ$  ( $c = 0.73$ ,  $\text{CHCl}_3$ ).  $^1\text{H NMR}$  (250 MHz,  $\text{CDCl}_3$ )  $\delta$  7.87 (d,  $J = 8.25$  Hz, 1H), 7.30-7.02 (m, 7H), 2.71-2.61 (m, 1H), 2.45-2.28 (m, 2H), 2.23 (s, 3H), 2.05-1.97 (m, 1H), 1.94 (s, 3H), 1.55 (s, 9H). The spectral data are identical to those in reference 4.

Additional Michael Acceptors were screened with the following results.

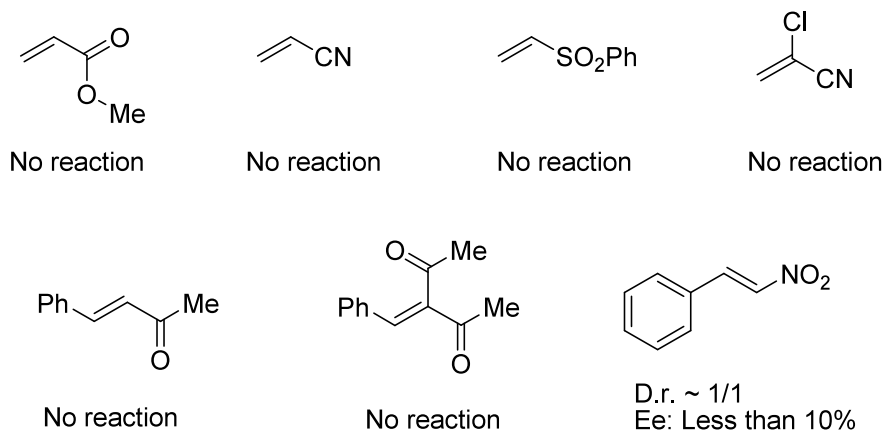

## References

- (1)(a) Hamashima, Y.; Suzuki, T.; Takano, H.; Shimura, Y.; Sodeoka, M. *J. Am. Chem. Soc.* **2005**, *127*, 10164-10165.(b) Rajeswaran, W. G.; Cohen, L. A. *Tetrahedron* **1998**, *54*, 11375-11380.(c) Ishimaru, T.; Shibata, N.; Nagai, J.; Nakamura, S.; Toru, T.; Kanemasa, S. *J. Am. Chem. Soc.* **2006**, *128*, 16488-16489.
- (2) Desai, A. A.; Huang, L.; Wulff, W. D.; Rowland, G. B.; Antilla, J. C. *Synthesis*, **2010**, *12*, 2106-2109.
- (3) Shibata, N.; Kohno, J.; Takai, K.; Nakamura, S.; Toru, T.; Kagemasa, S. *Angew. Chem., Int. Ed.* **2005**, *44*, 4204.
- (4) He, R.; Ding, C.; Maruoka, K. *Angew. Chem., Int. Ed.* **2009**, *48*, 4559.

Chiral HPLC analysis of compound 2a

**Chromatogram : WZ-3-40\_channel1**

System : HPLC  
 Method : Wenhua  
 User : User1

Acquired : 4/21/2010 10:11:44 PM  
 Processed : 4/21/2010 11:18:24 PM  
 Printed : 9/30/2010 12:44:51 AM

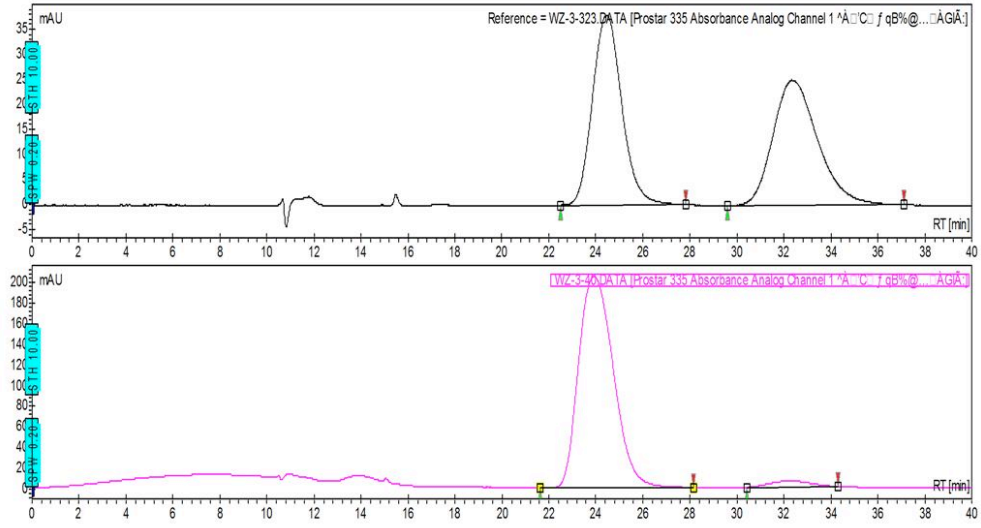

**Peak results :**

WZ-3-323.DATA [Prostar 335 Absorbance Analog Channel 1]

| Index | Name    | Time [Min] | Quantity [% Area] | Height [mAU] | Area [mAU.Min] | Area % [%] |
|-------|---------|------------|-------------------|--------------|----------------|------------|
| 1     | UNKNOWN | 24.45      | 49.91             | 37.8         | 54.6           | 49.914     |
| 2     | UNKNOWN | 32.33      | 50.09             | 24.9         | 54.8           | 50.086     |
| Total |         |            | 100.00            | 62.6         | 109.5          | 100.000    |

WZ-3-40.DATA [Prostar 335 Absorbance Analog Channel 1]

| Index | Name    | Time [Min] | Quantity [% Area] | Height [mAU] | Area [mAU.Min] | Area % [%] |
|-------|---------|------------|-------------------|--------------|----------------|------------|
| 1     | UNKNOWN | 23.92      | 96.78             | 204.5        | 350.3          | 96.781     |
| 2     | UNKNOWN | 32.21      | 3.22              | 5.7          | 11.6           | 3.219      |
| Total |         |            | 100.00            | 210.2        | 361.9          | 100.000    |

Chiral HPLC analysis of compound **2b**

**Chromatogram : WZ-3-4-OJ-90-0.5\_channel1**

System : HPLC  
 Method : Wenhua  
 User : User1

Acquired : 5/1/2010 10:39:10 PM  
 Processed : 5/1/2010 11:24:46 PM  
 Printed : 9/30/2010 12:47:46 AM

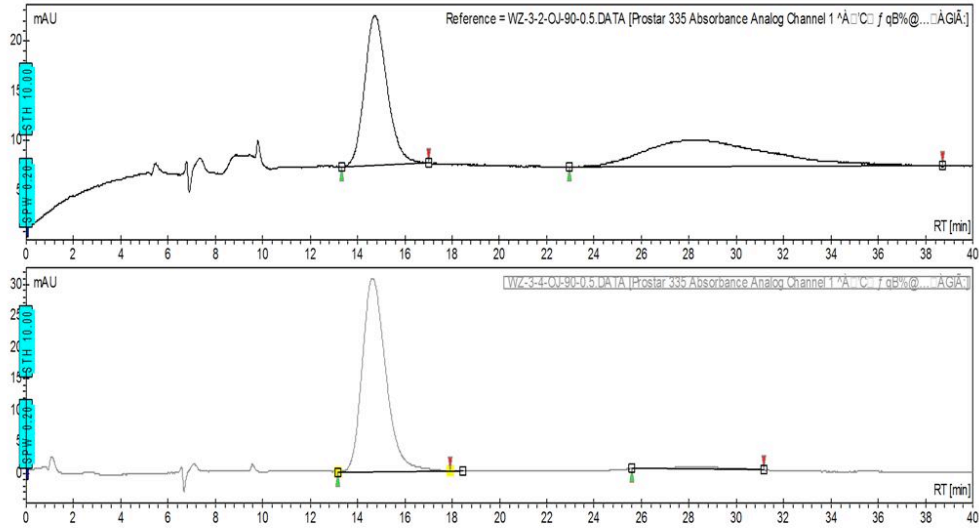

**Peak results :**

WZ-3-2-OJ-90-0.5.DAT [Prostar 335 Absorbance Analog Channel 1 \*Å□'C□ f qB%@...ÄGiÄ:]

| Index | Name    | Time [Min] | Quantity [% Area] | Height [mAU] | Area [mAU.Min] | Area % [%] |
|-------|---------|------------|-------------------|--------------|----------------|------------|
| 1     | UNKNOWN | 14.72      | 50.12             | 15.1         | 16.6           | 50.122     |
| 2     | UNKNOWN | 27.92      | 49.88             | 2.7          | 16.5           | 49.878     |
| Total |         |            | 100.00            | 17.7         | 33.0           | 100.000    |

WZ-3-4-OJ-90-0.5.DAT [Prostar 335 Absorbance Analog Channel 1 \*Å□'C□ f qB%@...ÄGiÄ:]

| Index | Name    | Time [Min] | Quantity [% Area] | Height [mAU] | Area [mAU.Min] | Area % [%] |
|-------|---------|------------|-------------------|--------------|----------------|------------|
| 1     | UNKNOWN | 14.63      | 96.47             | 30.7         | 35.6           | 96.468     |
| 2     | UNKNOWN | 28.28      | 3.53              | 0.5          | 1.3            | 3.532      |
| Total |         |            | 100.00            | 31.1         | 36.9           | 100.000    |



Chiral HPLC analysis of compound 2c

**Chromatogram : WZ-3-43\_channel1**

System : HPLC  
Method : Wenhua  
User : User1

Acquired : 4/22/2010 9:47:08 PM  
Processed : 4/27/2010 12:31:59 AM  
Printed : 9/30/2010 12:50:05 AM

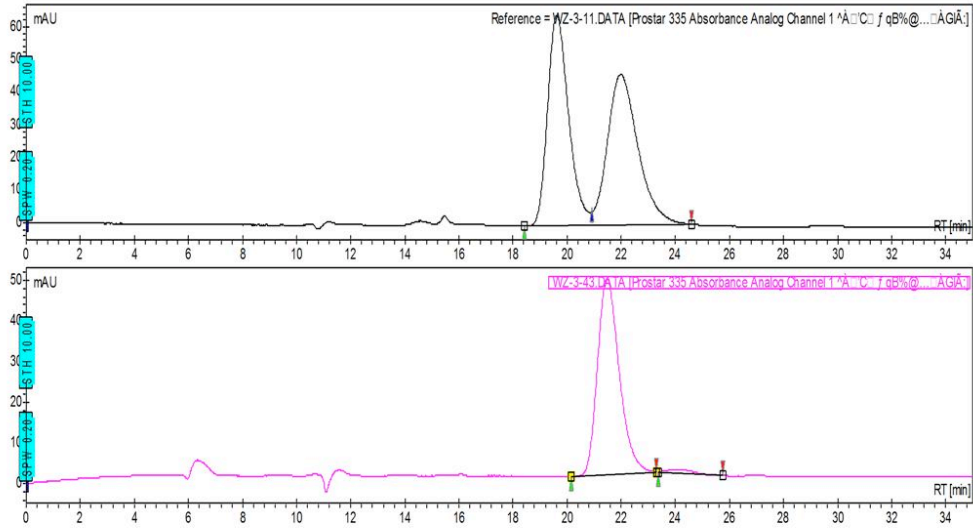

**Peak results :**

WZ-3-11.DAT [Prostar 335 Absorbance Analog Channel 1 ^Å°C f qB%@...ÄGIÄ:]

| Index | Name    | Time [Min] | Quantity [% Area] | Height [mAU] | Area [mAU.Min] | Area % [%] |
|-------|---------|------------|-------------------|--------------|----------------|------------|
| 1     | UNKNOWN | 19.61      | 49.06             | 64.5         | 58.1           | 49.057     |
| 2     | UNKNOWN | 21.99      | 50.94             | 46.2         | 60.4           | 50.943     |
| Total |         |            | 100.00            | 110.7        | 118.5          | 100.000    |

WZ-3-43.DAT [Prostar 335 Absorbance Analog Channel 1 ^Å°C f qB%@...ÄGIÄ:]

| Index | Name    | Time [Min] | Quantity [% Area] | Height [mAU] | Area [mAU.Min] | Area % [%] |
|-------|---------|------------|-------------------|--------------|----------------|------------|
| 1     | UNKNOWN | 21.48      | 97.86             | 48.1         | 44.7           | 97.862     |
| 2     | UNKNOWN | 24.11      | 2.14              | 1.0          | 1.0            | 2.138      |
| Total |         |            | 100.00            | 49.1         | 45.7           | 100.000    |

Chiral HPLC analysis of compound **2d**

**Chromatogram : WZ-3-41\_channel1**

System : HPLC  
Method : Wenhua  
User : User1

Acquired : 4/22/2010 10:29:39 AM  
Processed : 4/22/2010 11:12:11 AM  
Printed : 9/30/2010 12:57:58 AM

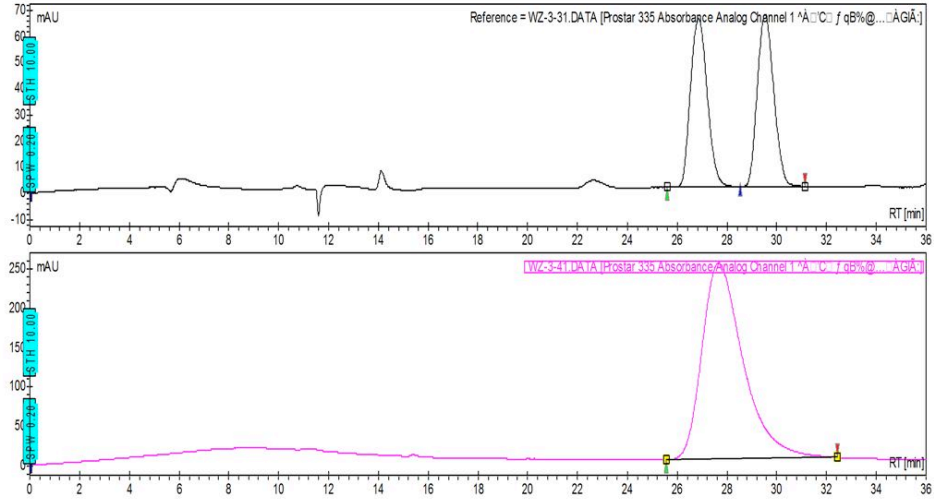

**Peak results :**

WZ-3-31.DATA [Prostar 335 Absorbance Analog Channel 1 ^A^C f qB%@...^GI^.]

| Index | Name    | Time [Min] | Quantity [% Area] | Height [mAU] | Area [mAU.Min] | Area % [%] |
|-------|---------|------------|-------------------|--------------|----------------|------------|
| 1     | UNKNOWN | 26.85      | 49.95             | 64.4         | 50.5           | 49.952     |
| 2     | UNKNOWN | 29.52      | 50.05             | 66.0         | 50.6           | 50.048     |
| Total |         |            | 100.00            | 130.4        | 101.1          | 100.000    |

WZ-3-41.DATA [Prostar 335 Absorbance Analog Channel 1 ^A^C f qB%@...^GI^.]

| Index | Name    | Time [Min] | Quantity [% Area] | Height [mAU] | Area [mAU.Min] | Area % [%] |
|-------|---------|------------|-------------------|--------------|----------------|------------|
| 1     | UNKNOWN | 27.65      | 100.00            | 249.0        | 477.5          | 100.000    |
| Total |         |            | 100.00            | 249.0        | 477.5          | 100.000    |

Chiral HPLC analysis of compound 2e

**Chromatogram : WZ-3-46-OJ-90-0.51\_channel1**

System : HPLC  
 Method : Wenhua  
 User : User1

Acquired : 5/2/2010 11:10:08 PM  
 Processed : 5/2/2010 11:54:09 PM  
 Printed : 9/30/2010 12:56:14 AM

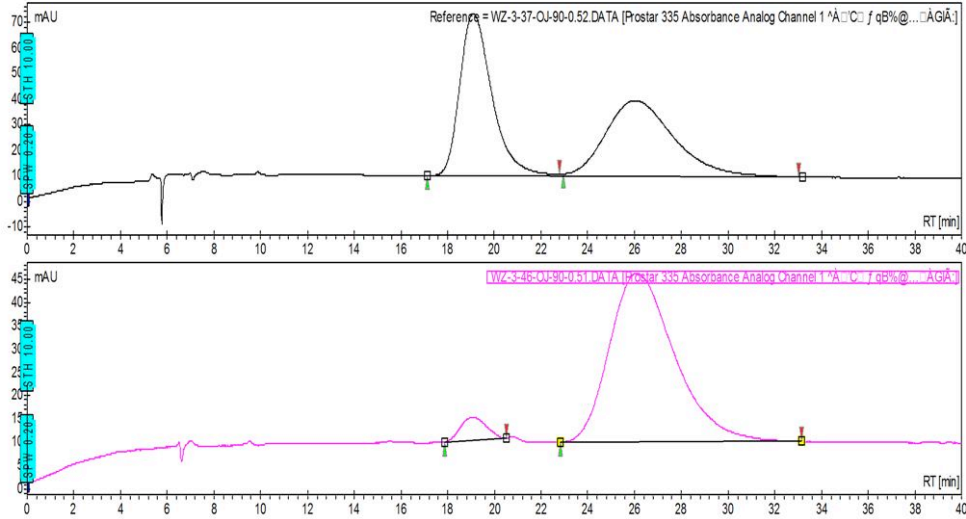

**Peak results :**

WZ-3-37-OJ-90-0.52.DATA [Prostar 335 Absorbance Analog Channel 1 ^A□C□ f qB%@...□ÄGIÄ:]

| Index | Name    | Time [Min] | Quantity [% Area] | Height [mAU] | Area [mAU.Min] | Area % [%] |
|-------|---------|------------|-------------------|--------------|----------------|------------|
| 1     | UNKNOWN | 19.11      | 50.25             | 63.4         | 101.3          | 50.250     |
| 2     | UNKNOWN | 26.04      | 49.75             | 29.6         | 100.3          | 49.750     |
| Total |         |            | 100.00            | 93.0         | 201.7          | 100.000    |

WZ-3-46-OJ-90-0.51.DATA [Prostar 335 Absorbance Analog Channel 1 ^A□C□ f qB%@...□ÄGIÄ:]

| Index | Name    | Time [Min] | Quantity [% Area] | Height [mAU] | Area [mAU.Min] | Area % [%] |
|-------|---------|------------|-------------------|--------------|----------------|------------|
| 2     | UNKNOWN | 19.05      | 5.14              | 5.0          | 6.3            | 5.144      |
| 1     | UNKNOWN | 26.09      | 94.86             | 36.3         | 116.8          | 94.856     |
| Total |         |            | 100.00            | 41.4         | 123.1          | 100.000    |

Chiral HPLC analysis of compound **2f**

**Chromatogram : WZ-3-381\_channel1**

System : HPLC  
Method : Wenhua  
User : User1

Acquired : 4/21/2010 10:23:38 AM  
Processed : 4/21/2010 11:26:27 AM  
Printed : 9/30/2010 12:52:56 AM

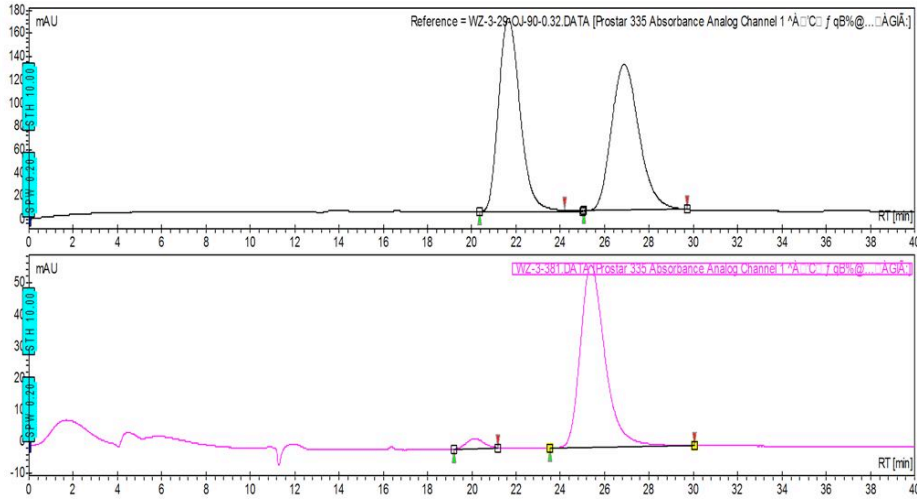

**Peak results :**

WZ-3-29-OJ-90-0.32.DATA [Prostar 335 Absorbance Analog Channel 1 ^A^C f qB%@...AGIA]

| Index | Name    | Time [Min] | Quantity [% Area] | Height [mAU] | Area [mAU.Min] | Area % [%] |
|-------|---------|------------|-------------------|--------------|----------------|------------|
| 1     | UNKNOWN | 21.65      | 50.63             | 166.0        | 185.6          | 50.635     |
| 2     | UNKNOWN | 26.88      | 49.37             | 125.7        | 180.9          | 49.365     |
| Total |         |            | 100.00            | 291.7        | 366.5          | 100.000    |

WZ-3-381.DATA [Prostar 335 Absorbance Analog Channel 1 ^A^C f qB%@...AGIA]

| Index | Name    | Time [Min] | Quantity [% Area] | Height [mAU] | Area [mAU.Min] | Area % [%] |
|-------|---------|------------|-------------------|--------------|----------------|------------|
| 2     | UNKNOWN | 20.11      | 3.62              | 3.1          | 2.8            | 3.625      |
| 1     | UNKNOWN | 25.39      | 96.38             | 57.5         | 73.9           | 96.375     |
| Total |         |            | 100.00            | 60.6         | 76.7           | 100.000    |

Chiral HPLC analysis of compound **2g**

**Chromatogram : WZ-3-62-Whelk-O1-90-1.0\_channel1**

System : HPLC  
Method : test  
User : User1

Acquired : 9/30/2010 12:22:00 PM  
Processed : 9/30/2010 1:11:25 PM  
Printed : 10/4/2010 3:08:24 PM

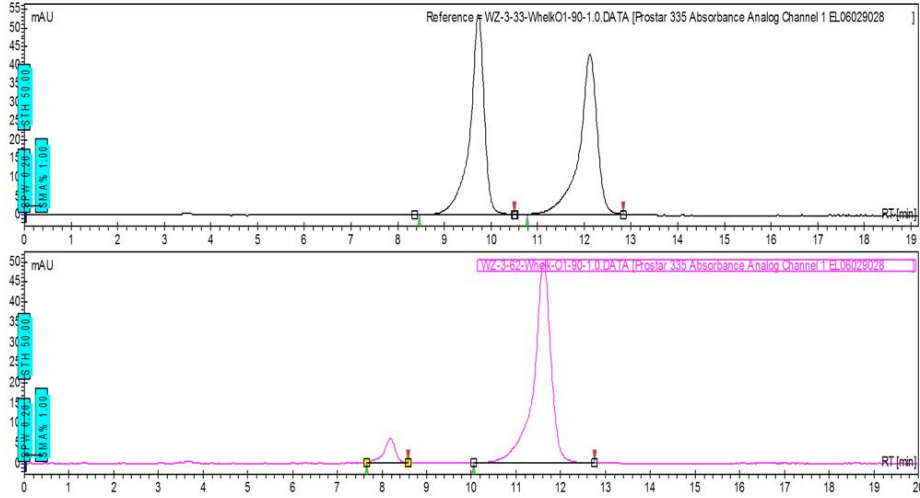

**Peak results :**

WZ-3-33-Whelk-O1-90-1.0.DATA [Prostar 335 Absorbance Analog Channel 1 EL06029028 ]

| Index | Time [Min] | Height [mAU] | Width USP [Min] | Area [mAU.Min] | Area % [%] |
|-------|------------|--------------|-----------------|----------------|------------|
| 1     | 9.73       | 53.8         | 0.51            | 19.2           | 50.094     |
| 2     | 12.12      | 42.9         | 0.63            | 19.1           | 49.906     |
| Total |            | 96.7         |                 | 38.3           | 100.000    |

WZ-3-62-Whelk-O1-90-1.0.DATA [Prostar 335 Absorbance Analog Channel 1 EL06029028 ]

| Index | Time [Min] | Height [mAU] | Width USP [Min] | Area [mAU.Min] | Area % [%] |
|-------|------------|--------------|-----------------|----------------|------------|
| 1     | 8.19       | 6.0          | 0.43            | 1.7            | 7.223      |
| 2     | 11.61      | 49.7         | 0.64            | 22.4           | 92.777     |
| Total |            | 55.8         |                 | 24.1           | 100.000    |

Chiral HPLC analysis of compound **2h**

**Chromatogram : 20100929\_channel1**

System : HPLC  
Method : test  
User : User1

Acquired : 9/30/2010 12:23:09 AM  
Processed : 9/30/2010 12:39:23 AM  
Printed : 9/30/2010 12:40:43 AM

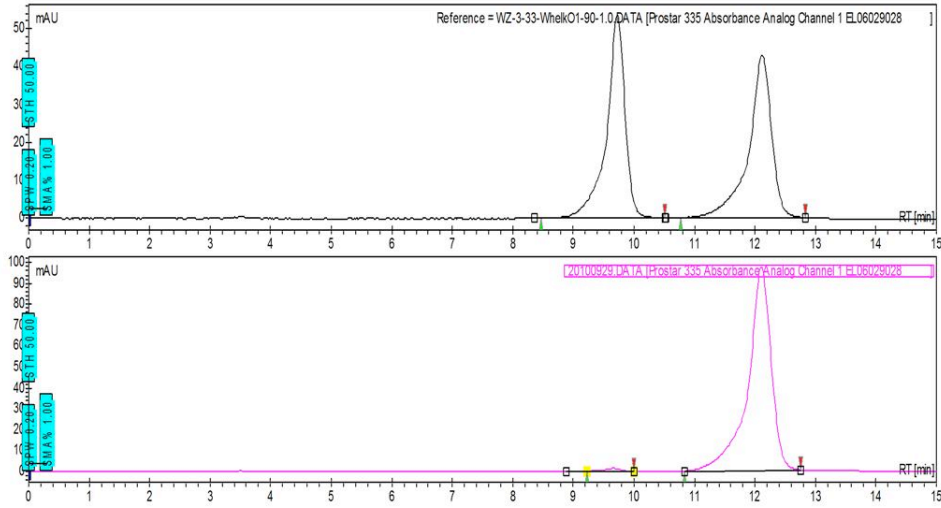

**Peak results :**

WZ-3-33-WhelkO1-90-1.0.DATA [Prostar 335 Absorbance Analog Channel 1 EL06029028 ]

| Index | Time [Min] | Height [mAU] | Width USP [Min] | Area [mAU.Min] | Area % [%] |
|-------|------------|--------------|-----------------|----------------|------------|
| 1     | 9.73       | 53.8         | 0.51            | 19.2           | 50.094     |
| 2     | 12.12      | 42.9         | 0.63            | 19.1           | 49.906     |
| Total |            | 96.7         |                 | 38.3           | 100.000    |

20100929.DATA [Prostar 335 Absorbance Analog Channel 1 EL06029028 ]

| Index | Time [Min] | Height [mAU] | Width USP [Min] | Area [mAU.Min] | Area % [%] |
|-------|------------|--------------|-----------------|----------------|------------|
| 1     | 9.65       | 1.8          | 0.49            | 0.6            | 1.406      |
| 2     | 12.11      | 97.4         | 0.63            | 43.6           | 98.594     |
| Total |            | 99.1         |                 | 44.2           | 100.000    |

Chiral HPLC analysis of compound **2i**

**Chromatogram : 20101008\_channel1**

System : HPLC  
Method : test  
User : User1

Acquired : 10/8/2010 11:46:50 AM  
Processed : 10/8/2010 12:23:53 PM  
Printed : 10/8/2010 12:24:47 PM

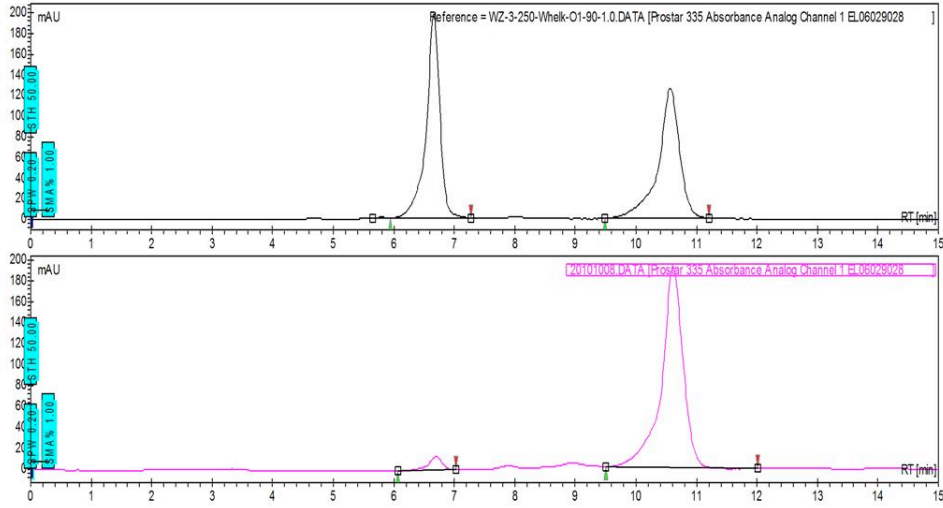

**Peak results :**

WZ-3-250-Whelk-O1-90-1.0.DAT [Prostar 335 Absorbance Analog Channel 1 EL06029028 ]

| Index | Time [Min] | Height [mAU] | Width USP [Min] | Area [mAU.Min] | Area % [%] |
|-------|------------|--------------|-----------------|----------------|------------|
| 1     | 6.67       | 197.7        | 0.37            | 52.4           | 50.498     |
| 2     | 10.56      | 125.1        | 0.58            | 51.3           | 49.502     |
| Total |            | 322.8        |                 | 103.7          | 100.000    |

20101008.DAT [Prostar 335 Absorbance Analog Channel 1 EL06029028 ]

| Index | Time [Min] | Height [mAU] | Width USP [Min] | Area [mAU.Min] | Area % [%] |
|-------|------------|--------------|-----------------|----------------|------------|
| 1     | 6.69       | 13.0         | 0.39            | 3.4            | 4.098      |
| 2     | 10.61      | 192.3        | 0.60            | 79.1           | 95.902     |
| Total |            | 205.3        |                 | 82.5           | 100.000    |

Chiral HPLC analysis of compound 2j

**Chromatogram : WZ-4-13-OJ-90-1.0\_channel1**

System : HPLC  
 Method : test  
 User : User1

Acquired : 9/13/2010 4:43:03 PM  
 Processed : 9/13/2010 8:55:43 PM  
 Printed : 9/30/2010 12:32:48 AM

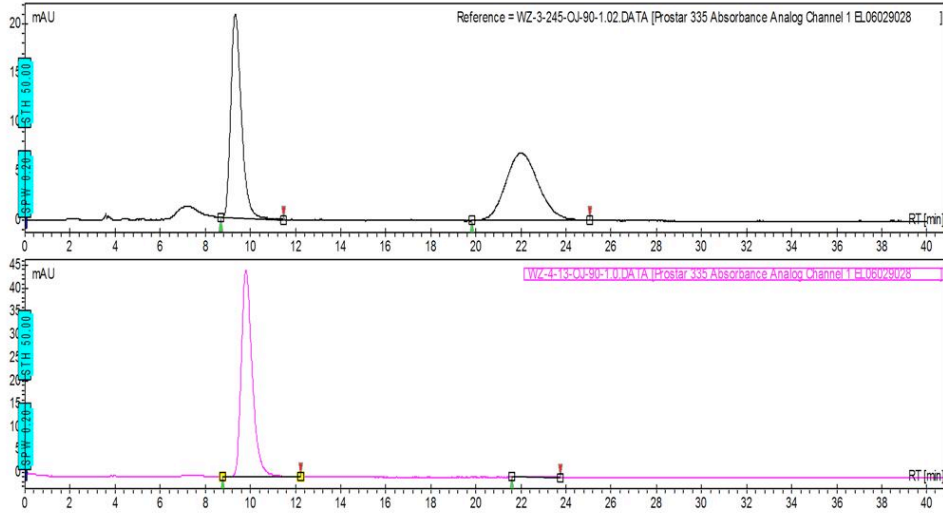

**Peak results :**

WZ-3-245-OJ-90-1.02\_DATA [Prostar 335 Absorbance Analog Channel 1 EL06029028 ]

| Index | Time [Min] | Height [mAU] | Width USP [Min] | Area [mAU.Min] | Area % [%] |
|-------|------------|--------------|-----------------|----------------|------------|
| 1     | 9.33       | 20.8         | 0.85            | 11.4           | 49.632     |
| 2     | 21.99      | 6.9          | 2.67            | 11.6           | 50.368     |
| Total |            | 27.7         |                 | 23.0           | 100.000    |

WZ-4-13-OJ-90-1.0\_DATA [Prostar 335 Absorbance Analog Channel 1 EL06029028 ]

| Index | Time [Min] | Height [mAU] | Width USP [Min] | Area [mAU.Min] | Area % [%] |
|-------|------------|--------------|-----------------|----------------|------------|
| 1     | 9.80       | 44.8         | 0.87            | 25.3           | 99.059     |
| 2     | 22.64      | 0.2          | 1.38            | 0.2            | 0.941      |
| Total |            | 45.0         |                 | 25.5           | 100.000    |



Chiral HPLC analysis of compound **2k**

**Chromatogram : WZ-3-45-repeat\_channel1**

System : HPLC  
 Method : test  
 User : User1

Acquired : 10/4/2010 3:27:06 PM  
 Processed : 10/4/2010 4:12:13 PM  
 Printed : 10/4/2010 4:12:53 PM

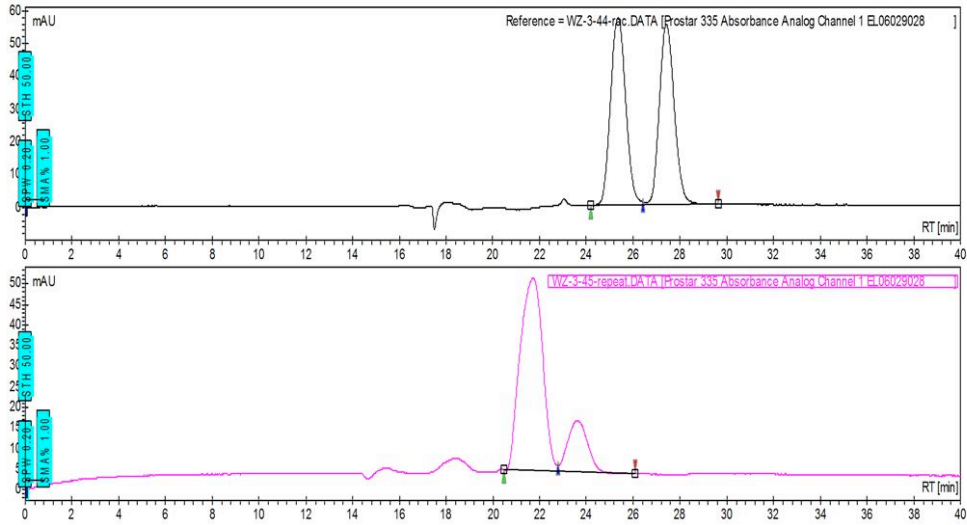

**Peak results :**

WZ-3-44-rac.DAT [Prostar 335 Absorbance Analog Channel 1 EL06029028 ]

| Index | Time [Min] | Height [mAU] | Width USP [Min] | Area [mAU.Min] | Area % [%] |
|-------|------------|--------------|-----------------|----------------|------------|
| 1     | 25.36      | 56.9         | 1.19            | 42.6           | 51.243     |
| 2     | 27.41      | 54.9         | 1.18            | 40.6           | 48.757     |
| Total |            | 111.8        |                 | 83.2           | 100.000    |

WZ-3-45-repeat.DAT [Prostar 335 Absorbance Analog Channel 1 EL06029028 ]

| Index | Time [Min] | Height [mAU] | Width USP [Min] | Area [mAU.Min] | Area % [%] |
|-------|------------|--------------|-----------------|----------------|------------|
| 1     | 21.73      | 46.8         | 1.74            | 52.4           | 81.176     |
| 2     | 23.61      | 12.5         | 1.55            | 12.2           | 18.824     |
| Total |            | 59.3         |                 | 64.6           | 100.000    |

Chiral HPLC analysis of compound **21**

**Chromatogram : WZ-4-103-SS-Whelk-90-1.0\_channel1**

System : HPLC  
Method : test  
User : User1

Acquired : 12/28/2010 12:04:32 AM  
Processed : 12/28/2010 12:34:22 AM  
Printed : 1/15/2011 11:17:53 AM

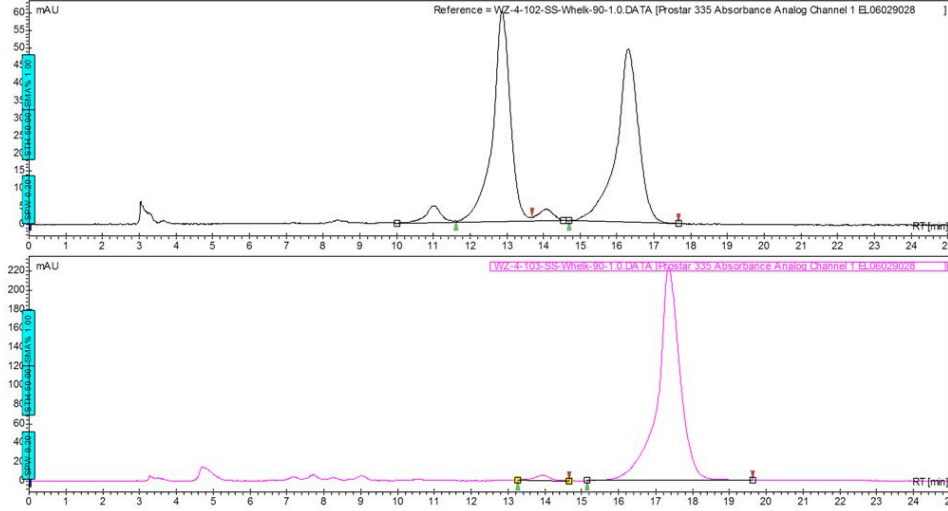

**Peak results :**

WZ-4-102-SS-Whelk-90-1.0.DATA [Prostar 335 Absorbance Analog Channel 1 EL06029028 ]

| Index | Time [Min] | Height [mAU] | Width USP [Min] | Area [mAU.Min] | Area % [%] |
|-------|------------|--------------|-----------------|----------------|------------|
| 2     | 12.88      | 59.7         | 0.80            | 33.3           | 49.104     |
| 1     | 16.31      | 49.4         | 0.98            | 34.5           | 50.896     |
| Total |            | 109.1        |                 | 67.8           | 100.000    |

WZ-4-103-SS-Whelk-90-1.0.DATA [Prostar 335 Absorbance Analog Channel 1 EL06029028 ]

| Index | Time [Min] | Height [mAU] | Width USP [Min] | Area [mAU.Min] | Area % [%] |
|-------|------------|--------------|-----------------|----------------|------------|
| 1     | 13.93      | 5.2          | 0.74            | 2.5            | 1.576      |
| 2     | 17.36      | 223.9        | 1.01            | 156.6          | 98.424     |
| Total |            | 229.0        |                 | 159.1          | 100.000    |

Chiral HPLC analysis of compound **3a**

**Chromatogram : WZ-3-282-AD-94-1.0\_channel1**

System : HPLC  
 Method : test  
 User : User1

Acquired : 9/8/2010 12:02:52 PM  
 Processed : 10/15/2010 11:47:47 AM  
 Printed : 10/17/2010 6:21:33 PM

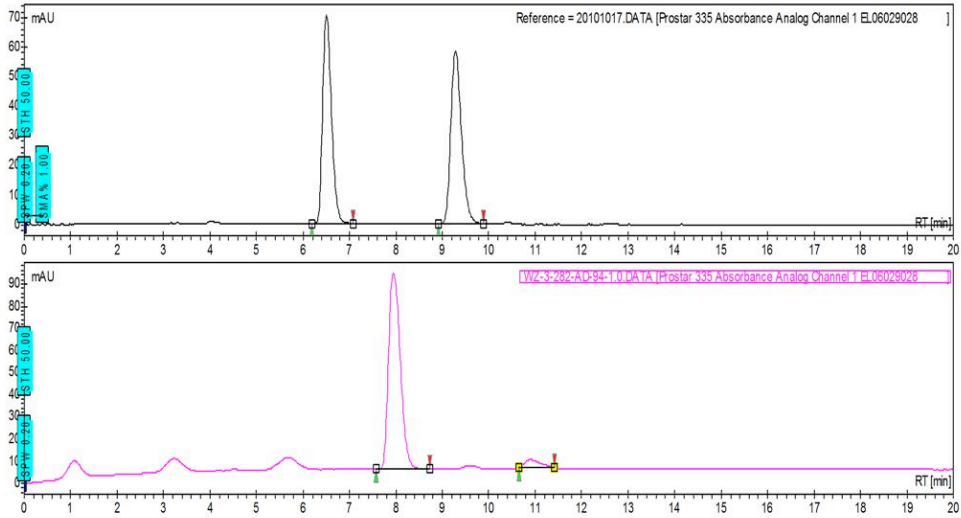

**Peak results :**

20101017.DATA [Prostar 335 Absorbance Analog Channel 1 EL06029028 ]

| Index | Time [Min] | Height [mAU] | Width USP [Min] | Area [mAU.Min] | Area % [%] |
|-------|------------|--------------|-----------------|----------------|------------|
| 1     | 6.51       | 71.0         | 0.35            | 15.8           | 50.022     |
| 2     | 9.28       | 58.8         | 0.42            | 15.8           | 49.978     |
| Total |            | 129.8        |                 | 31.6           | 100.000    |

WZ-3-282-AD-94-1.0.DATA [Prostar 335 Absorbance Analog Channel 1 EL06029028 ]

| Index | Time [Min] | Height [mAU] | Width USP [Min] | Area [mAU.Min] | Area % [%] |
|-------|------------|--------------|-----------------|----------------|------------|
| 2     | 7.95       | 88.5         | 0.46            | 26.2           | 94.891     |
| 1     | 10.89      | 3.6          | 0.65            | 1.4            | 5.109      |
| Total |            | 92.1         |                 | 27.6           | 100.000    |

Chiral HPLC analysis of compound **3b**

**Chromatogram : WZ-4-2-AD-94-1.0\_channel1**

System : HPLC  
 Method : test  
 User : User1

Acquired : 9/11/2010 10:23:04 PM  
 Processed : 9/11/2010 10:41:12 PM  
 Printed : 10/17/2010 6:24:32 PM

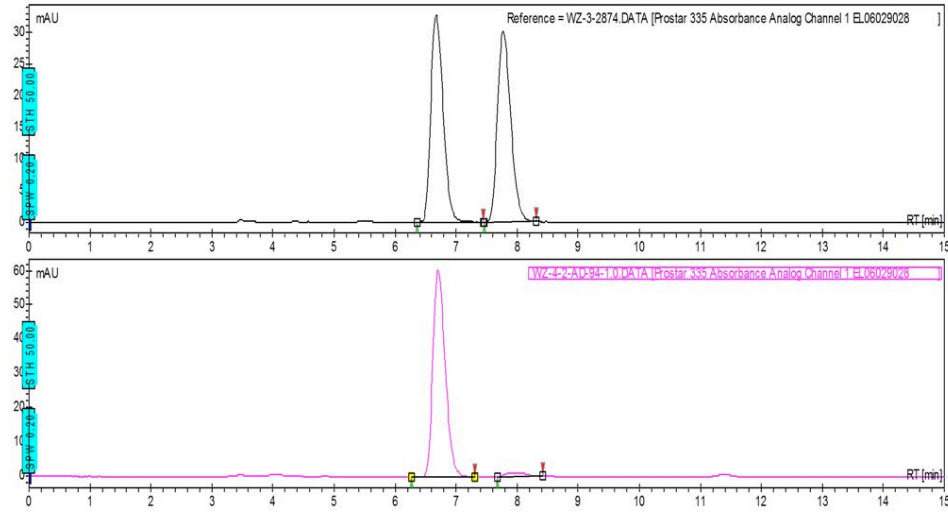

**Peak results :**

WZ-3-2874.D [Prostar 335 Absorbance Analog Channel 1 EL06029028 ]

| Index | Time [Min] | Height [mAU] | Width USP [Min] | Area [mAU.Min] | Area % [%] |
|-------|------------|--------------|-----------------|----------------|------------|
| 1     | 6.67       | 32.6         | 0.37            | 7.7            | 50.191     |
| 2     | 7.77       | 30.0         | 0.40            | 7.6            | 49.809     |
| Total |            | 62.6         |                 | 15.3           | 100.000    |

WZ-4-2-AD-94-1.0.D [Prostar 335 Absorbance Analog Channel 1 EL06029028 ]

| Index | Time [Min] | Height [mAU] | Width USP [Min] | Area [mAU.Min] | Area % [%] |
|-------|------------|--------------|-----------------|----------------|------------|
| 1     | 6.71       | 60.5         | 0.38            | 14.2           | 97.392     |
| 2     | 7.87       | 1.0          | 0.55            | 0.4            | 2.608      |
| Total |            | 61.5         |                 | 14.6           | 100.000    |

Chiral HPLC analysis of compound **3c**

**Chromatogram : WZ-4-7-AD-94-1.0\_channel1**

System : HPLC  
 Method : test  
 User : User1

Acquired : 9/12/2010 3:15:44 PM  
 Processed : 9/12/2010 3:41:10 PM  
 Printed : 10/17/2010 6:27:42 PM

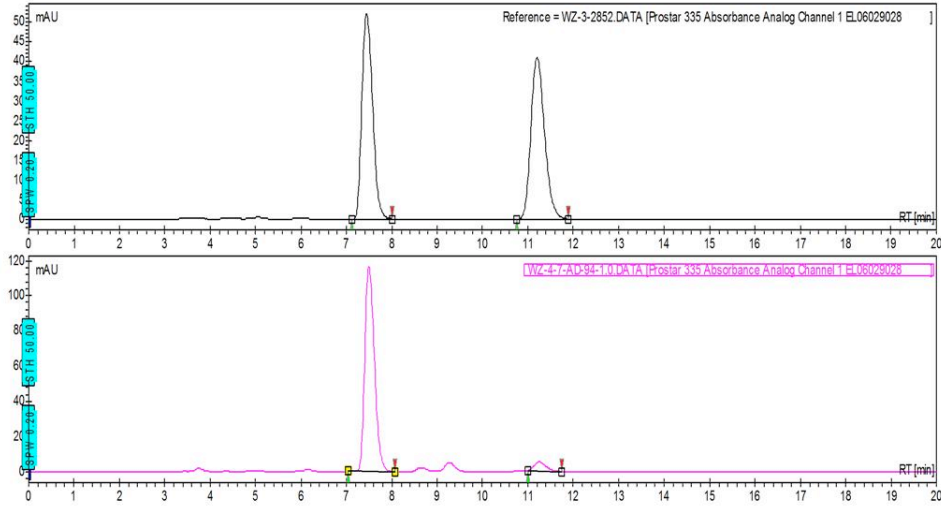

**Peak results :**

WZ-3-2852.DATA [Prostar 335 Absorbance Analog Channel 1 EL06029028 ]

| Index | Time [Min] | Height [mAU] | Width USP [Min] | Area [mAU.Min] | Area % [%] |
|-------|------------|--------------|-----------------|----------------|------------|
| 1     | 7.44       | 52.1         | 0.43            | 14.3           | 50.066     |
| 2     | 11.20      | 41.0         | 0.55            | 14.3           | 49.934     |
| Total |            | 93.1         |                 | 28.6           | 100.000    |

WZ-4-7-AD-94-1.0.DATA [Prostar 335 Absorbance Analog Channel 1 EL06029028 ]

| Index | Time [Min] | Height [mAU] | Width USP [Min] | Area [mAU.Min] | Area % [%] |
|-------|------------|--------------|-----------------|----------------|------------|
| 1     | 7.49       | 116.5        | 0.39            | 28.7           | 94.815     |
| 2     | 11.25      | 5.1          | 0.50            | 1.6            | 5.185      |
| Total |            | 121.6        |                 | 30.3           | 100.000    |

Chiral HPLC analysis of compound **3d**

**Chromatogram : WZ-4-6-AD-94-1.0\_channel1**

System : HPLC  
 Method : test  
 User : User1

Acquired : 9/12/2010 2:42:22 PM  
 Processed : 9/12/2010 3:12:51 PM  
 Printed : 10/17/2010 6:26:13 PM

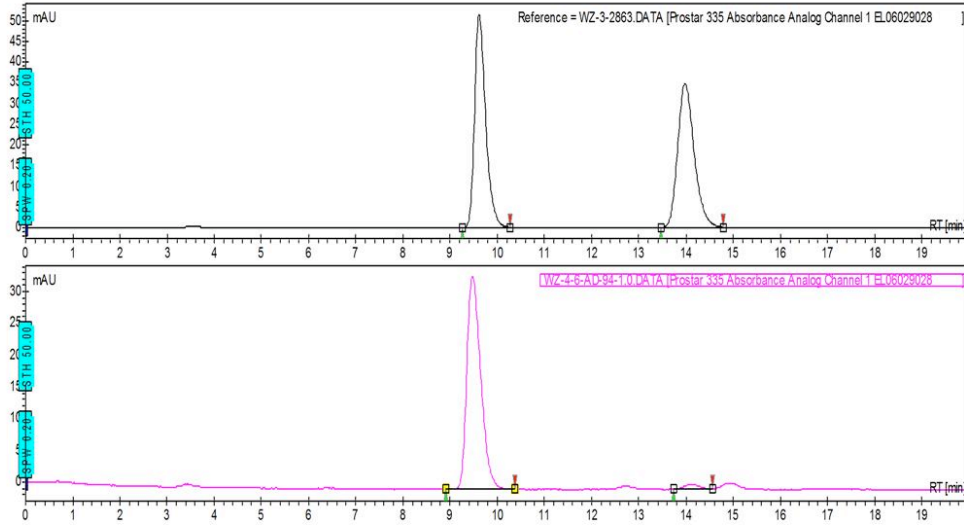

**Peak results :**

WZ-3-2863.DATA [Prostar 335 Absorbance Analog Channel 1 EL06029028 ]

| Index | Time [Min] | Height [mAU] | Width USP [Min] | Area [mAU.Min] | Area % [%] |
|-------|------------|--------------|-----------------|----------------|------------|
| 1     | 9.61       | 51.6         | 0.42            | 14.0           | 49.834     |
| 2     | 13.97      | 34.8         | 0.63            | 14.1           | 50.166     |
| Total |            | 86.3         |                 | 28.1           | 100.000    |

WZ-4-6-AD-94-1.0.DATA [Prostar 335 Absorbance Analog Channel 1 EL06029028 ]

| Index | Time [Min] | Height [mAU] | Width USP [Min] | Area [mAU.Min] | Area % [%] |
|-------|------------|--------------|-----------------|----------------|------------|
| 1     | 9.48       | 33.6         | 0.55            | 11.5           | 97.641     |
| 2     | 14.11      | 0.8          | 0.65            | 0.3            | 2.359      |
| Total |            | 34.4         |                 | 11.8           | 100.000    |

# <sup>1</sup>H NMR of Compound 2a

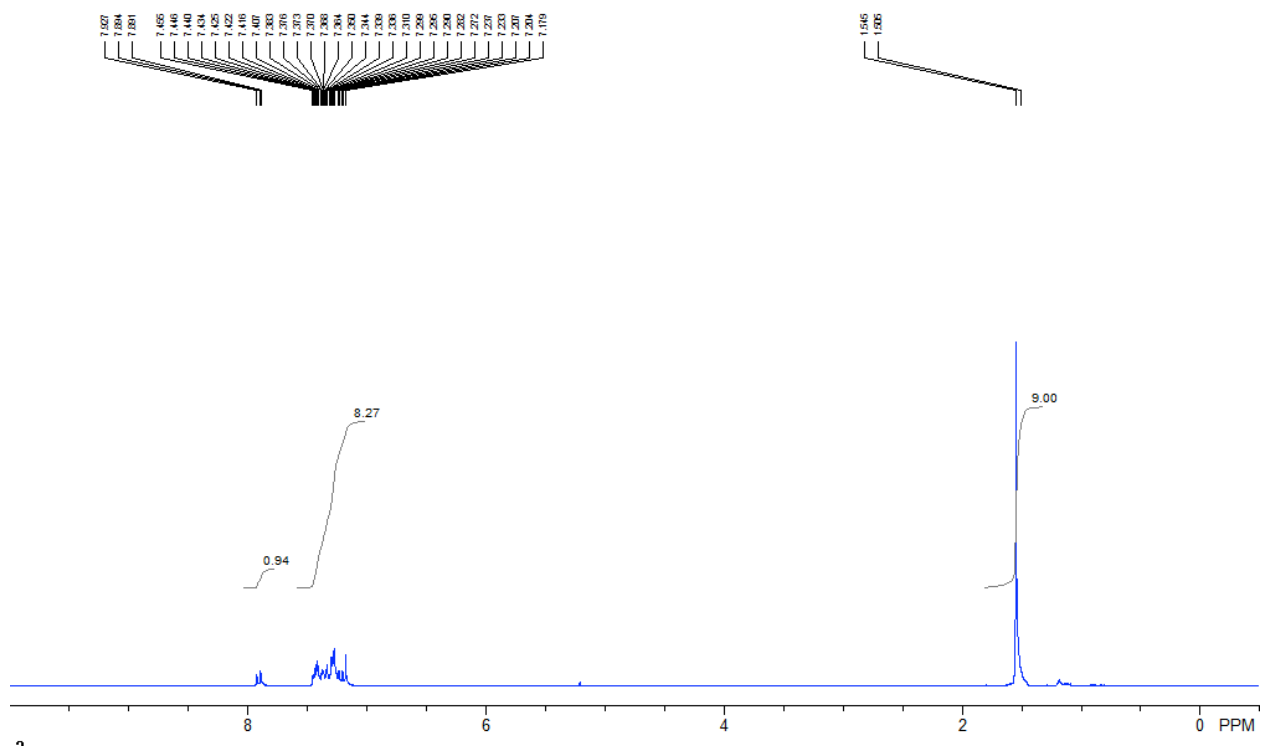

# <sup>13</sup>C NMR of Compound 2a

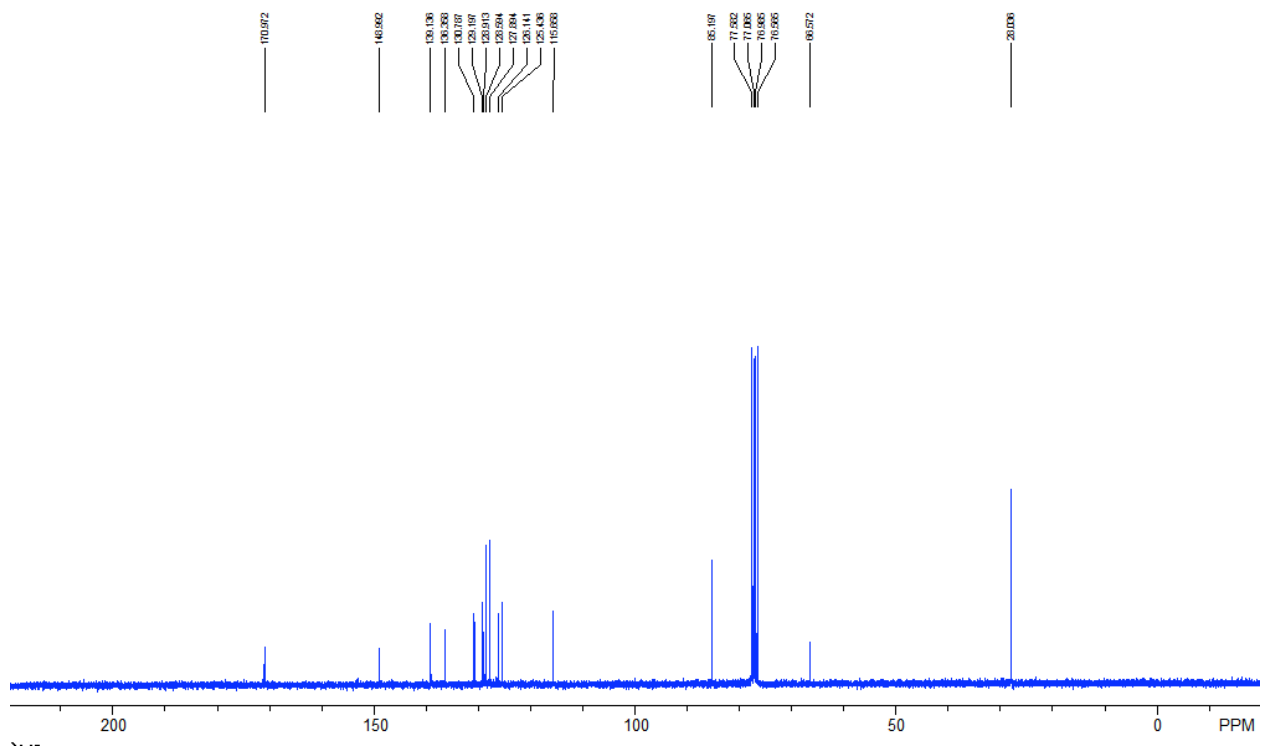

# <sup>1</sup>H NMR of Compound 2b

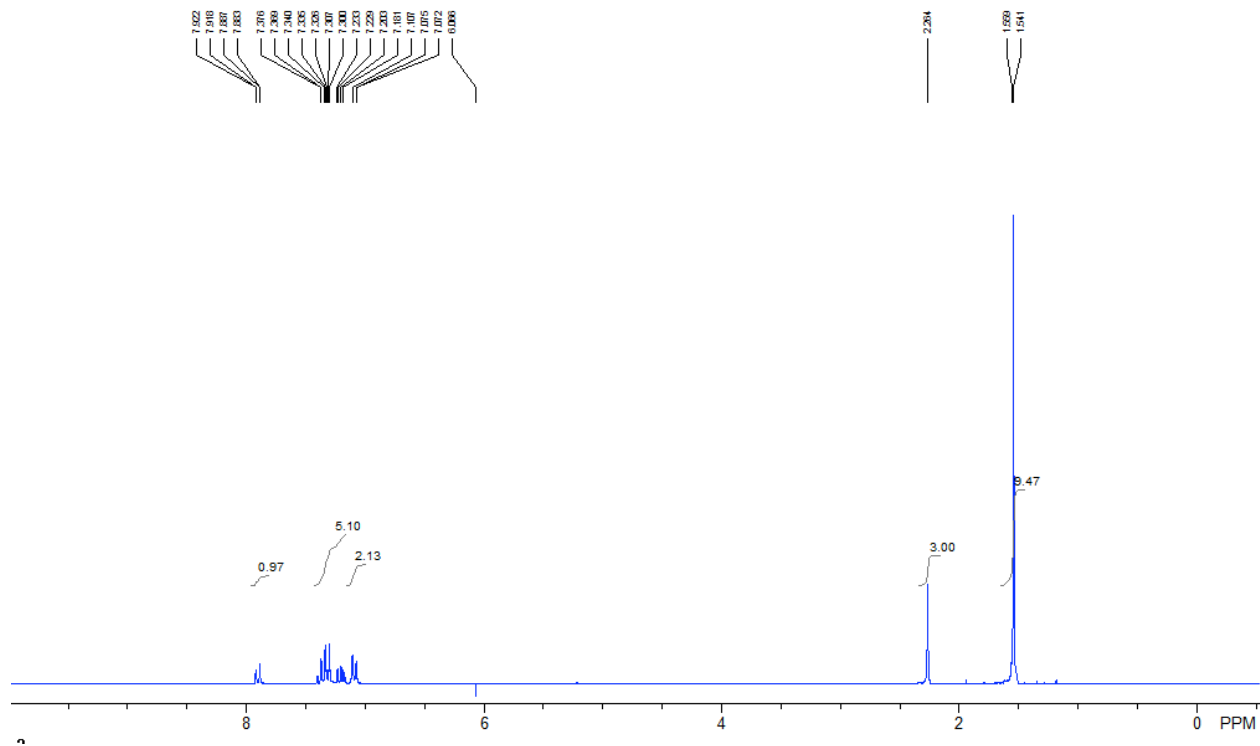

# <sup>13</sup>C NMR of Compound 2b

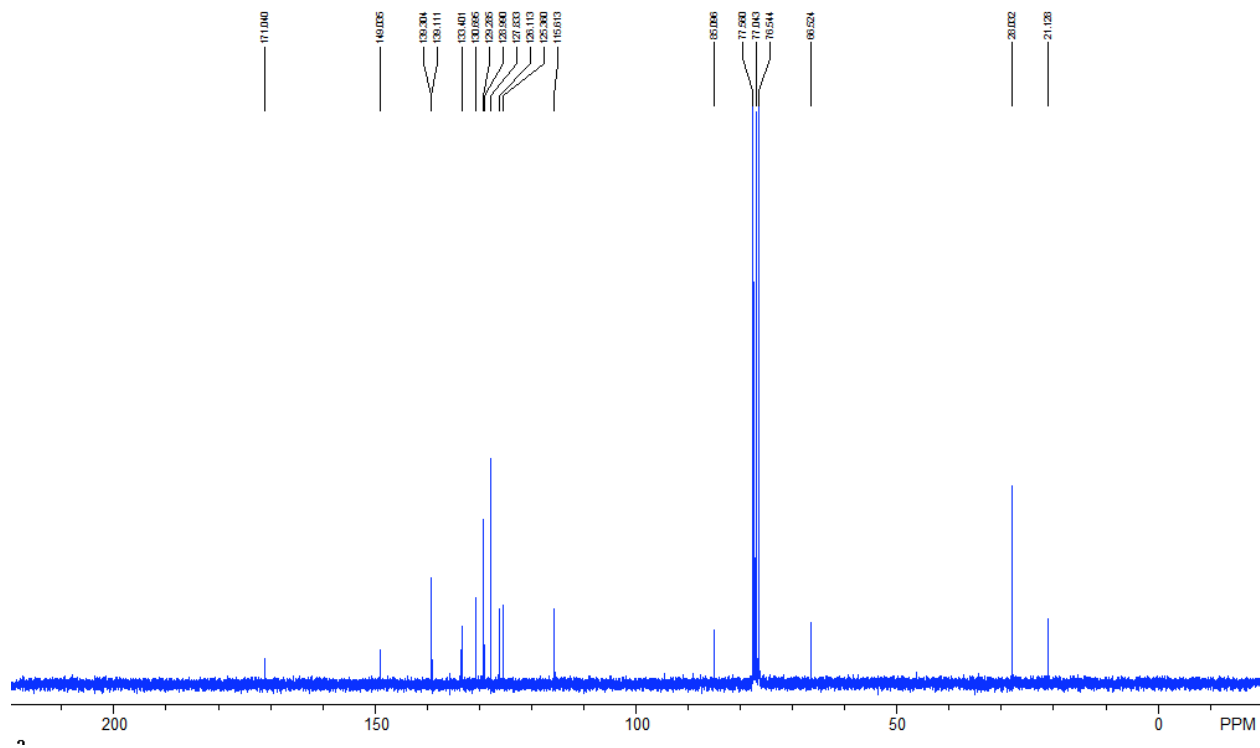



# <sup>1</sup>H NMR of Compound 2c

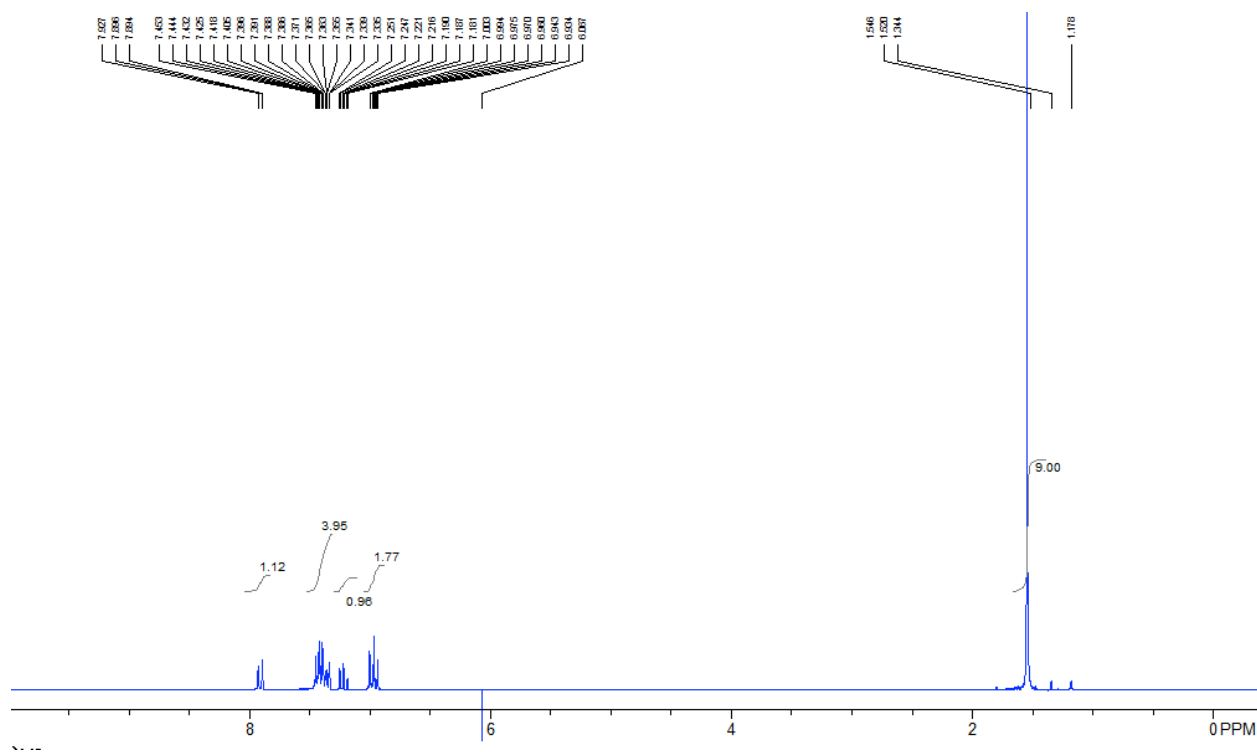

# <sup>13</sup>C NMR of Compound 2c

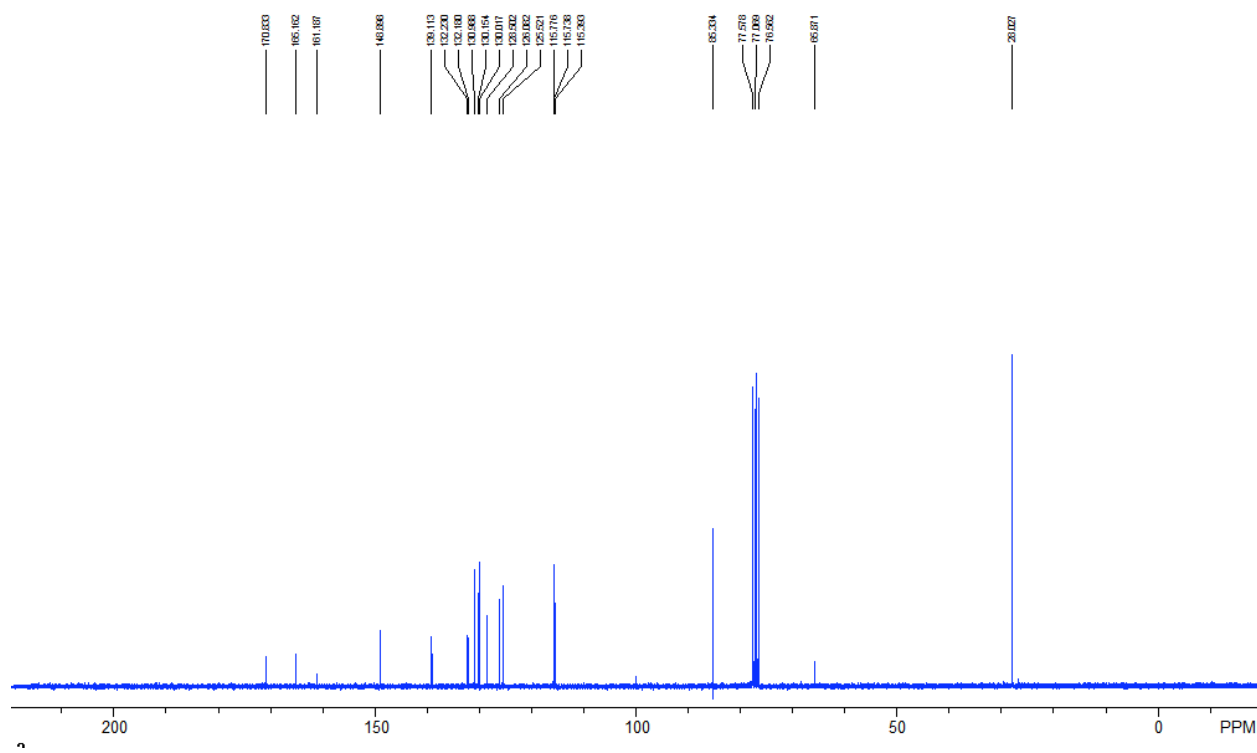

# <sup>1</sup>H NMR of Compound 2d

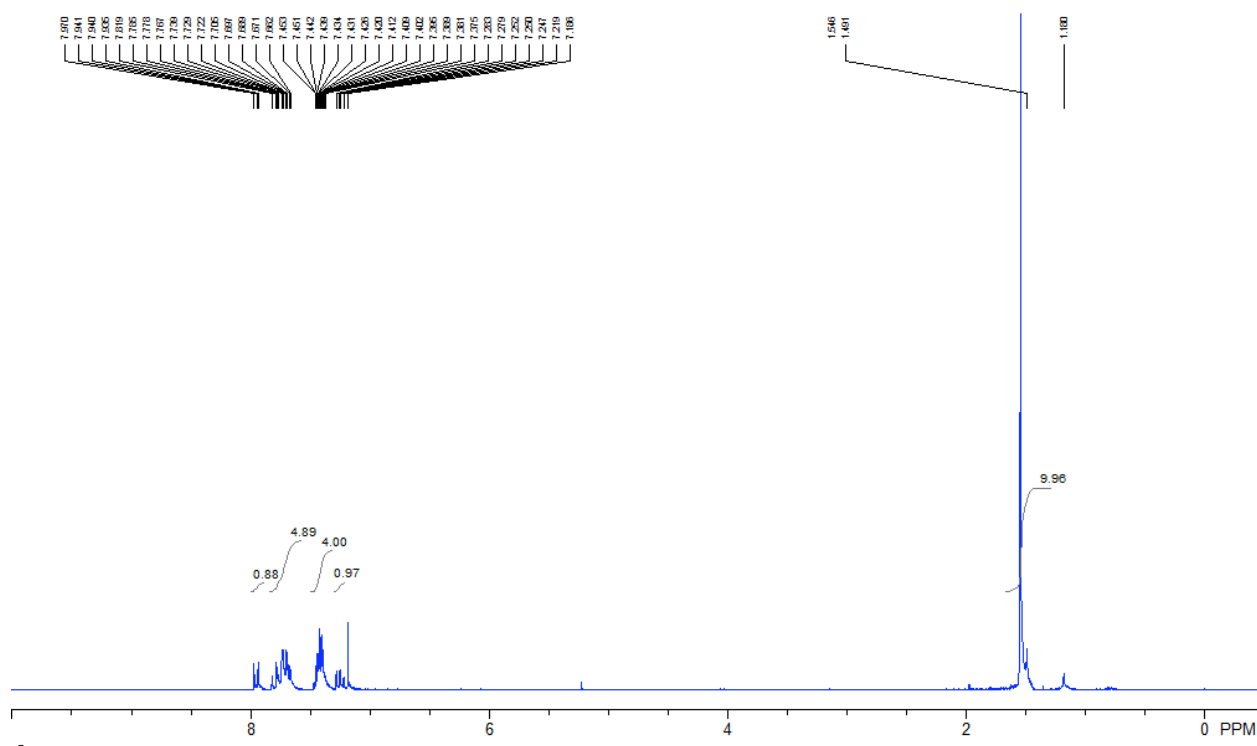

# <sup>13</sup>C NMR of Compound 2d

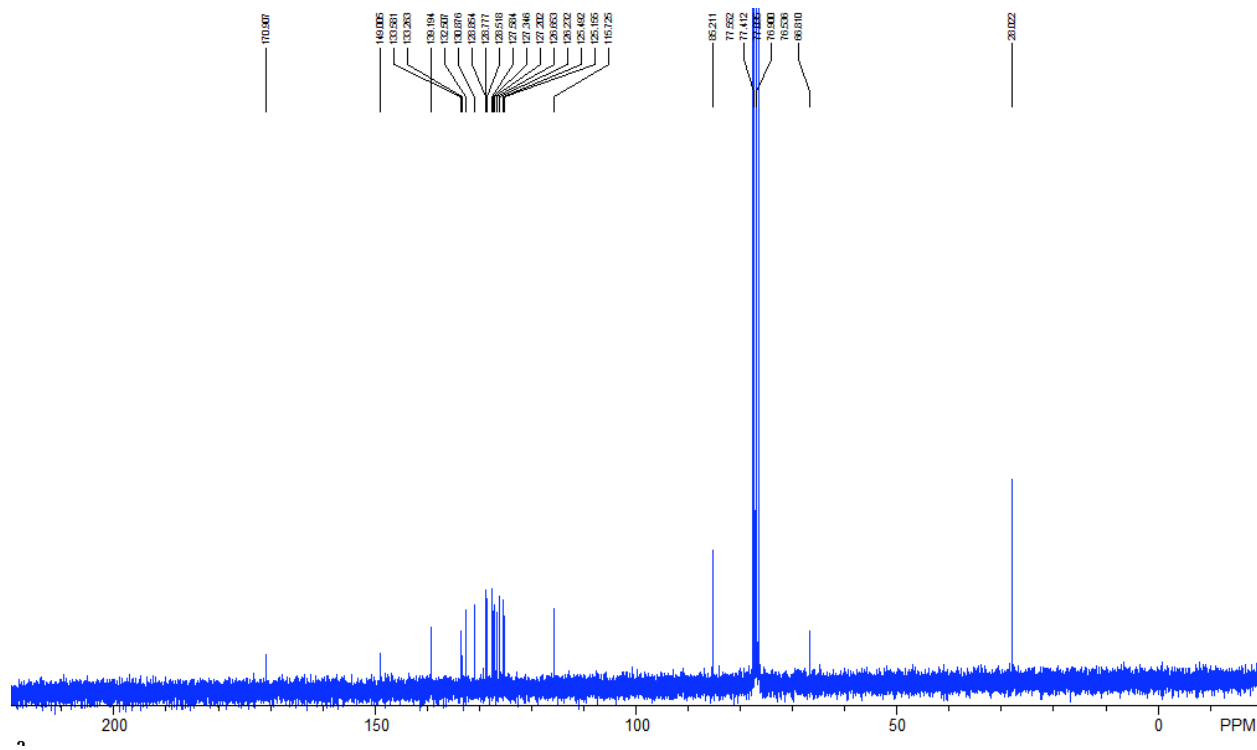

# <sup>1</sup>H NMR of Compound 2e

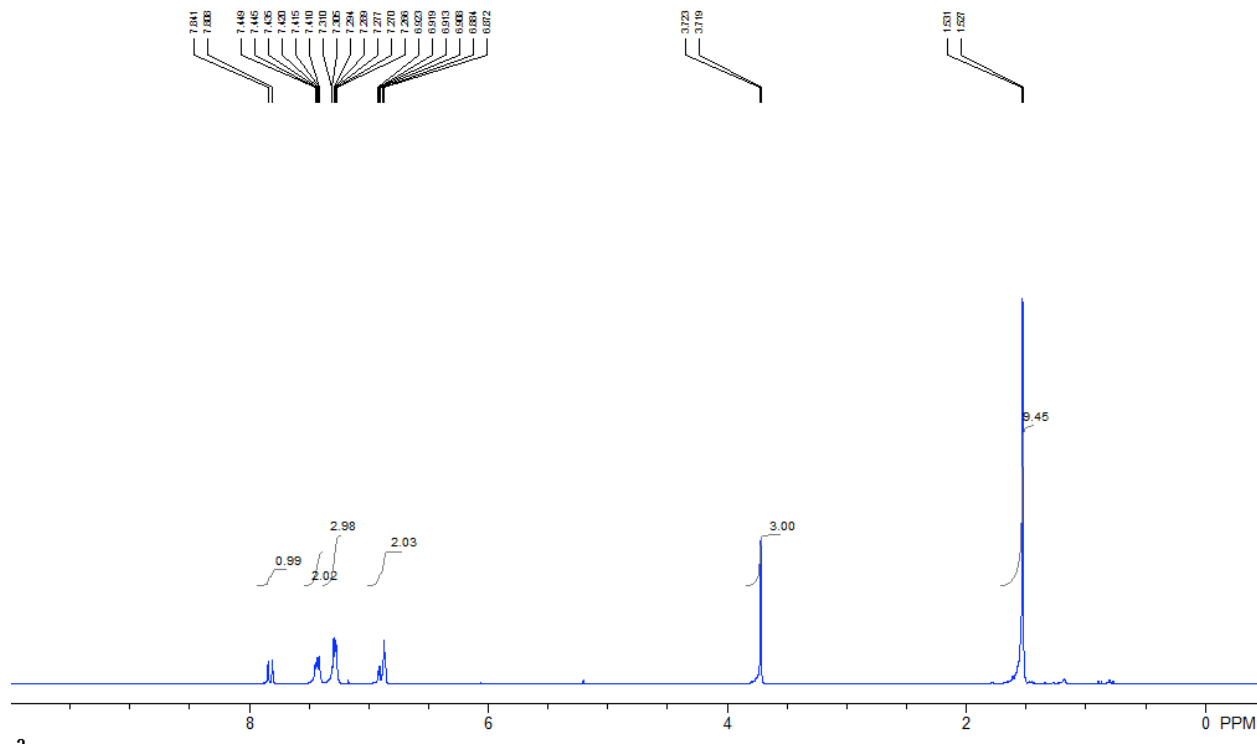

# <sup>13</sup>C NMR of Compound 2e

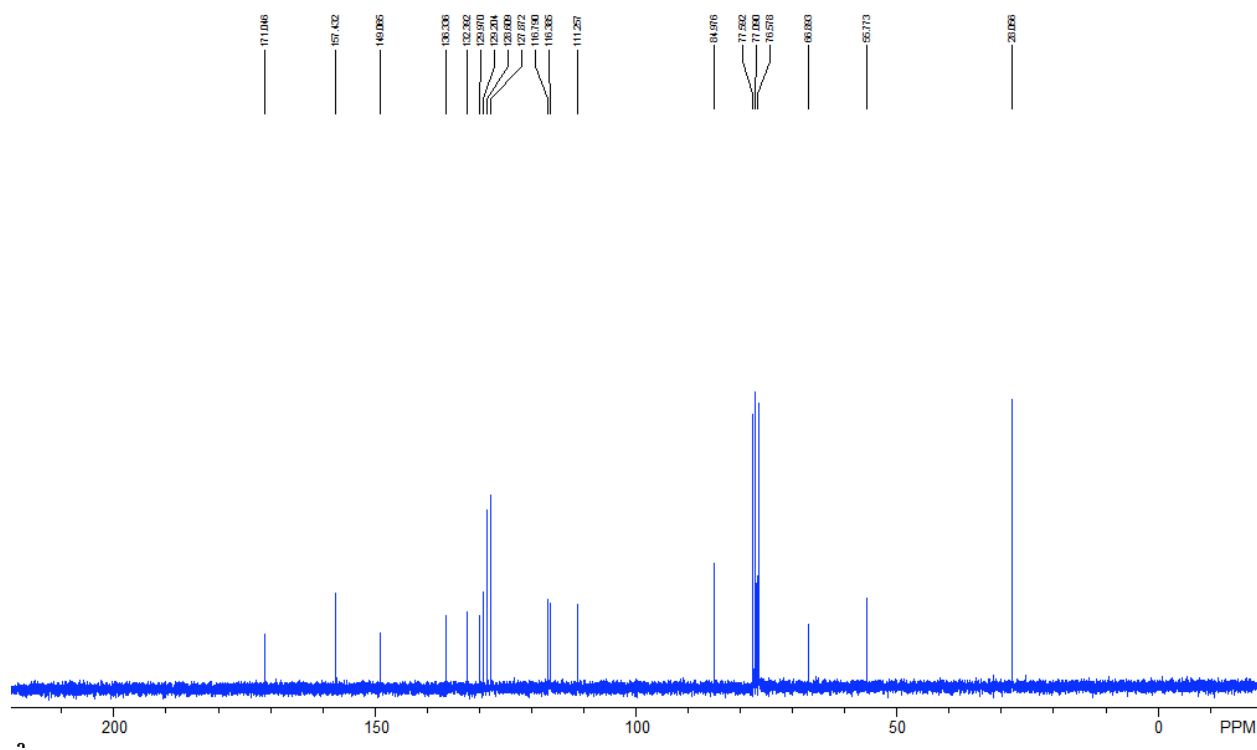

# $^1\text{H}$ NMR of Compound **2f**

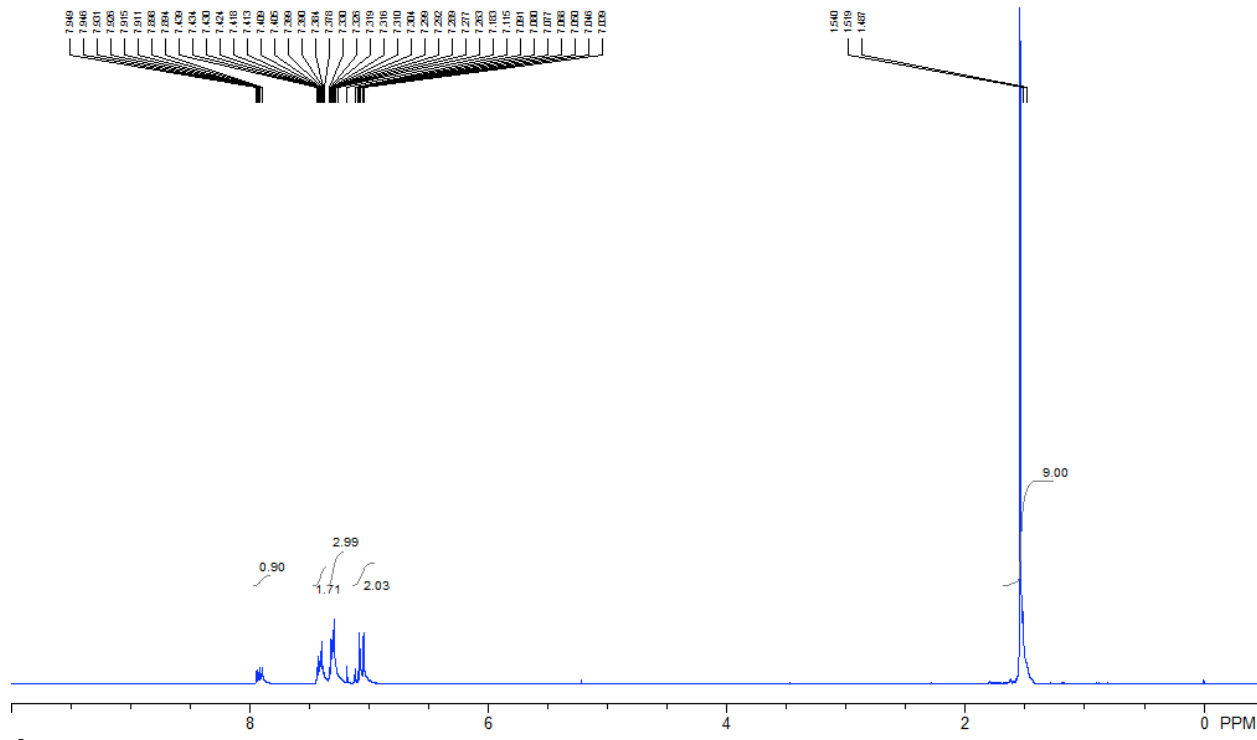

# $^{13}\text{C}$ NMR of Compound **2f**

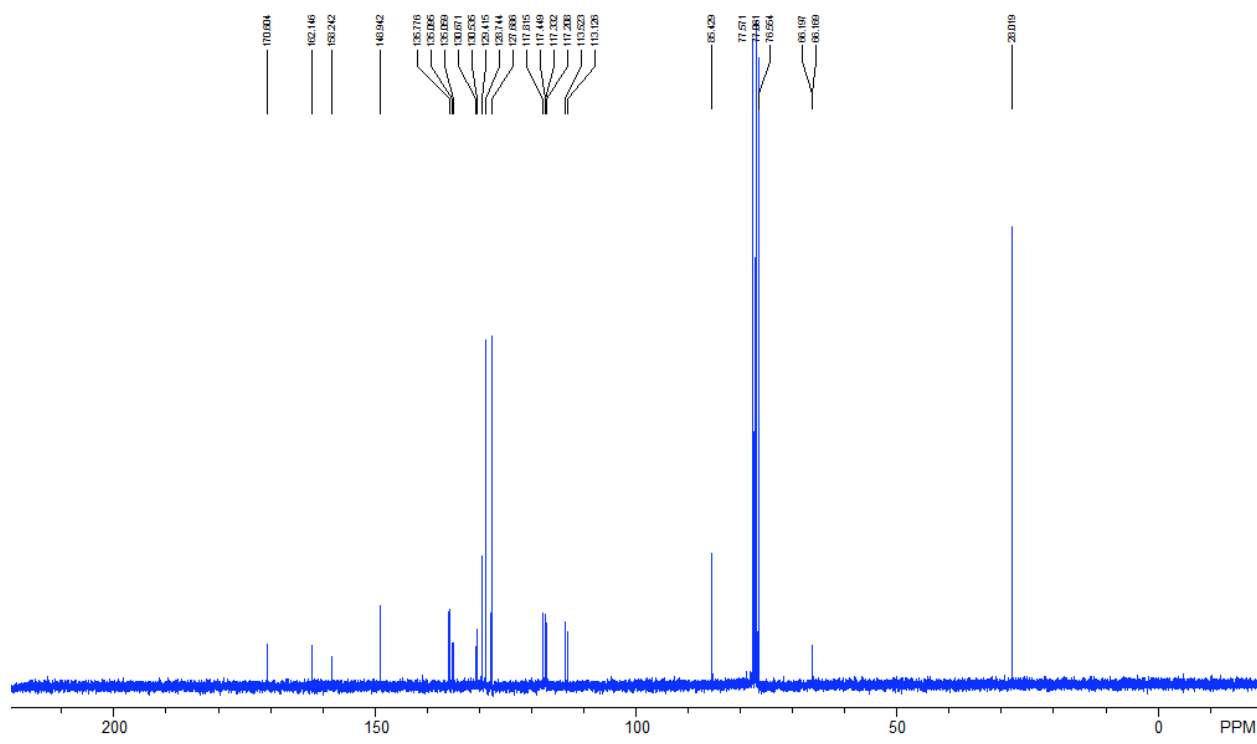

<sup>1</sup>H NMR of Compound **2g**

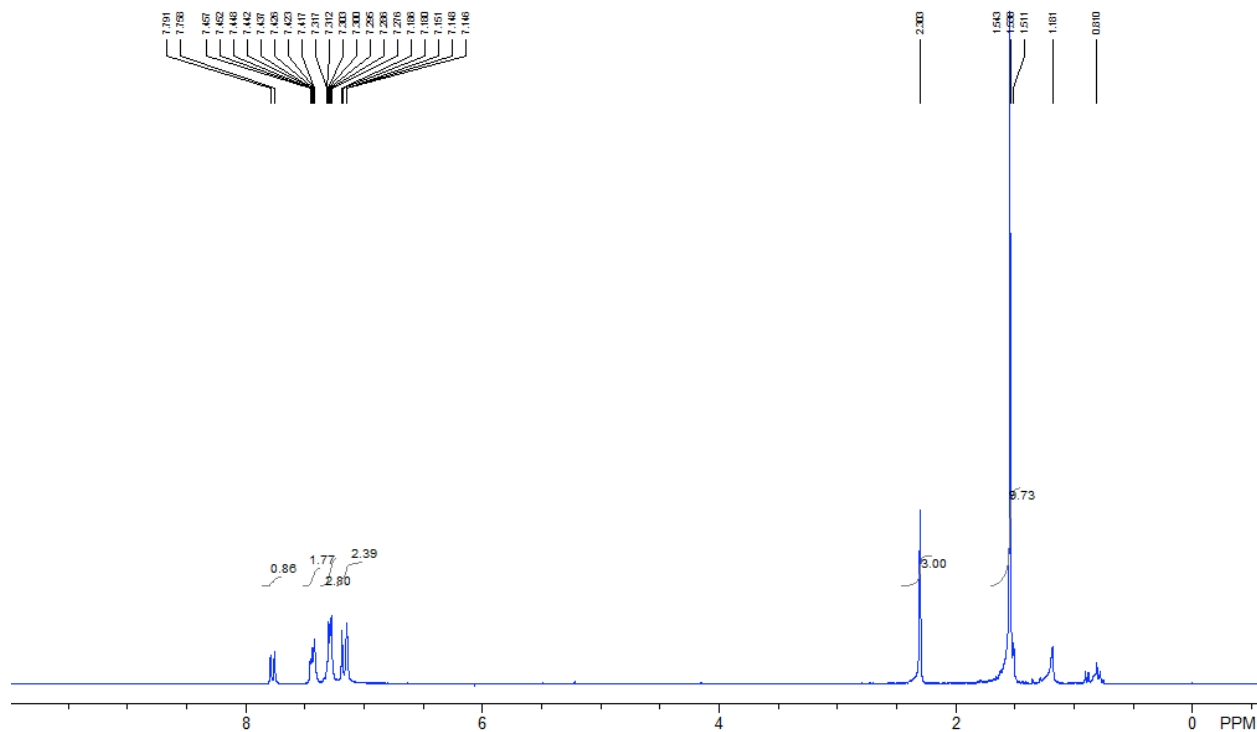

<sup>13</sup>C NMR of Compound **2g**

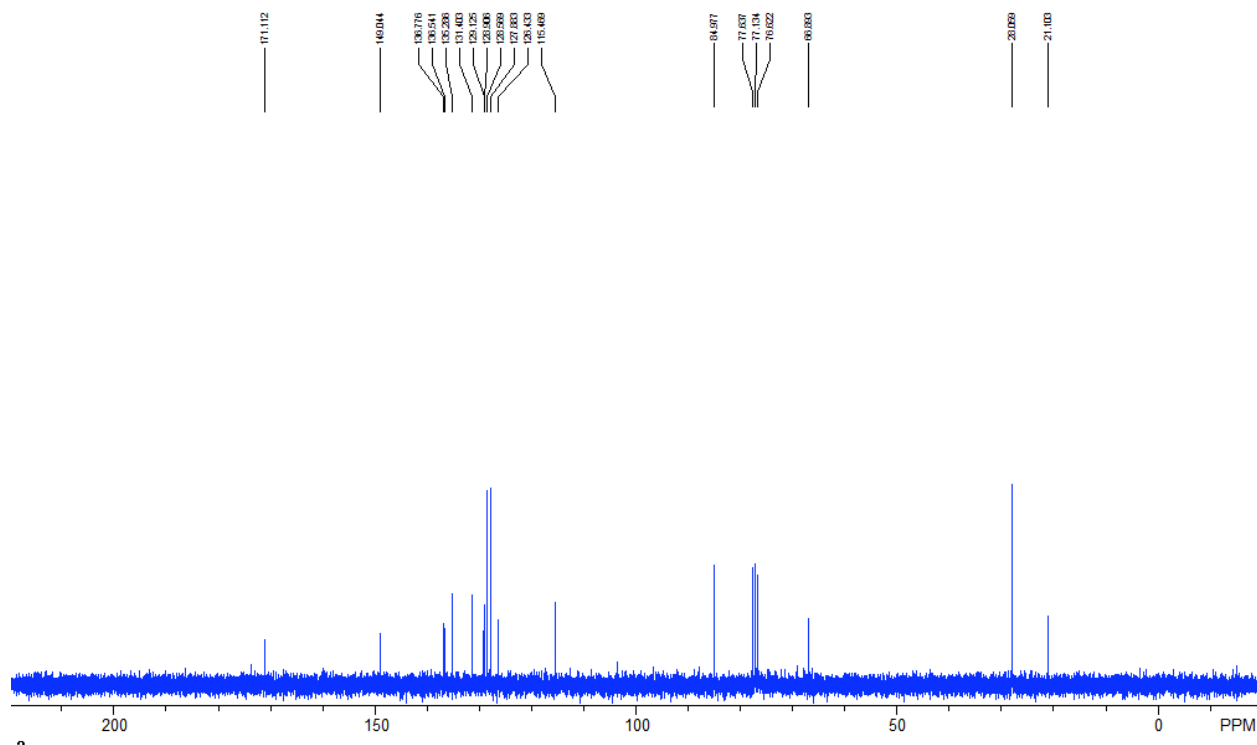

# <sup>1</sup>H NMR of Compound 2h

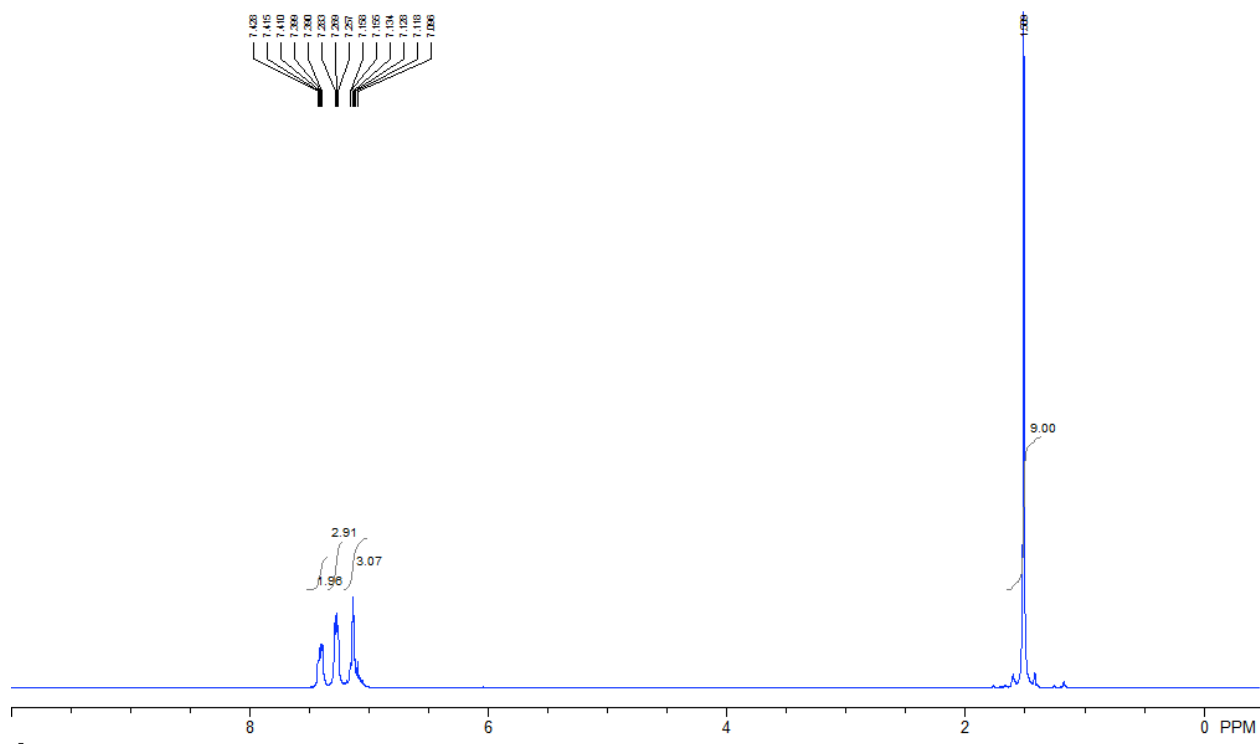

# <sup>13</sup>C NMR of Compound 2h

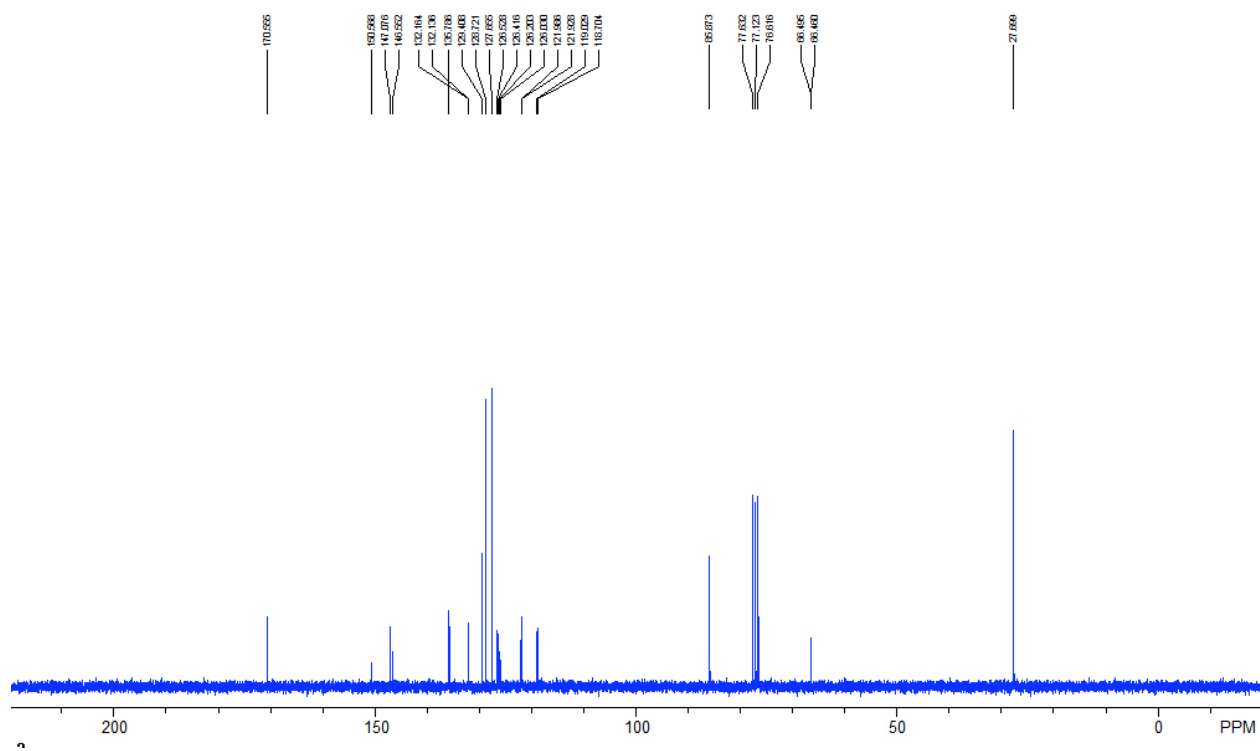

# <sup>1</sup>H NMR of Compound 2i

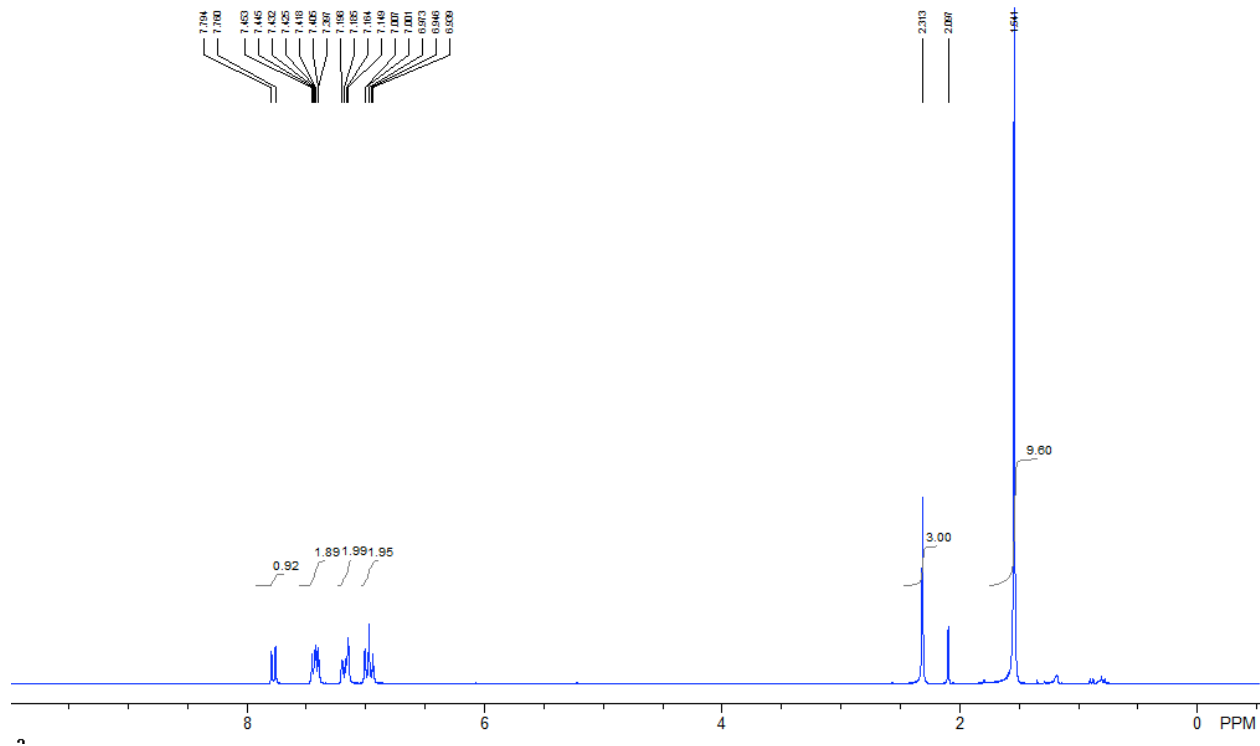

# <sup>13</sup>C NMR of Compound 2i

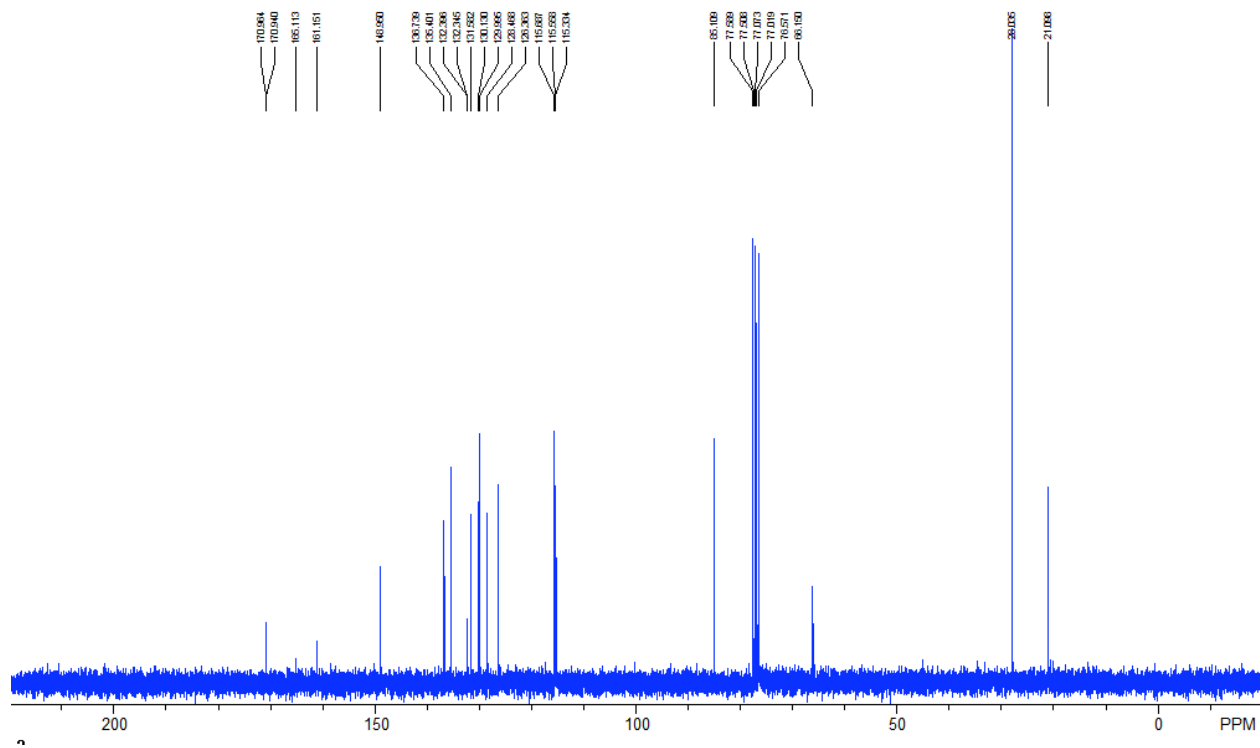

# <sup>1</sup>H NMR of Compound 2j

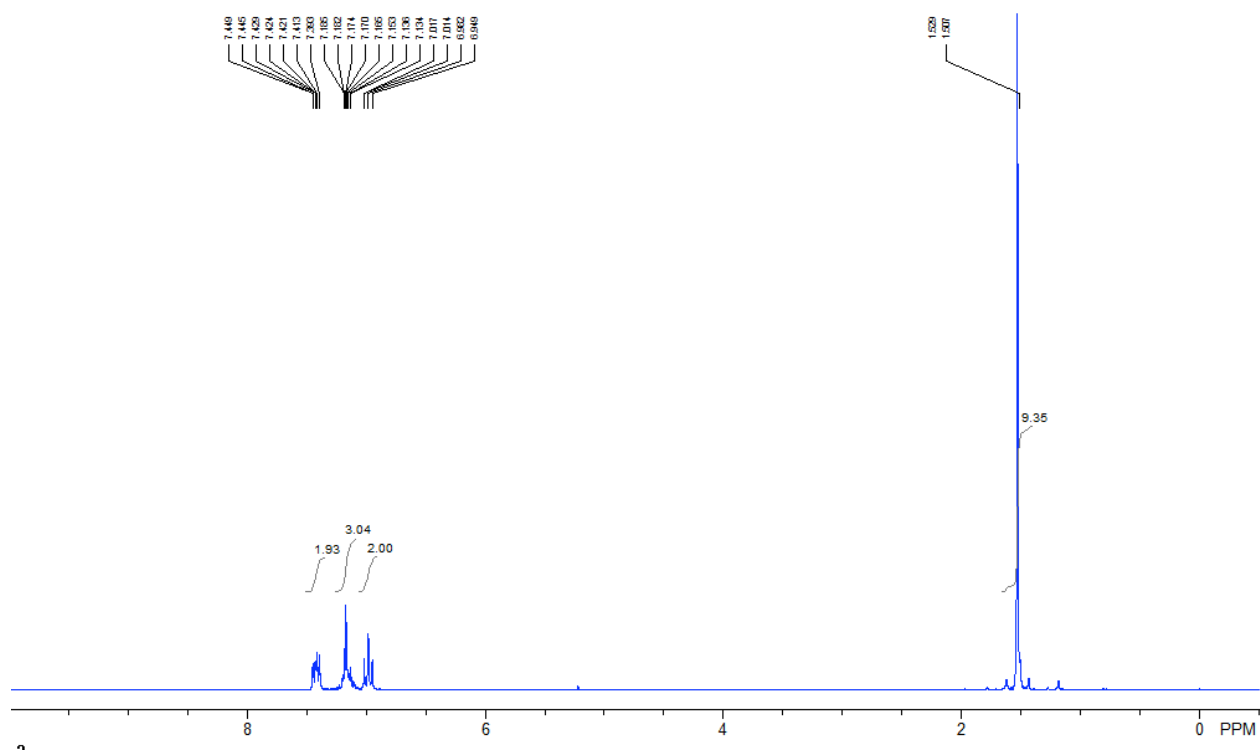

# <sup>13</sup>C NMR of Compound 2j

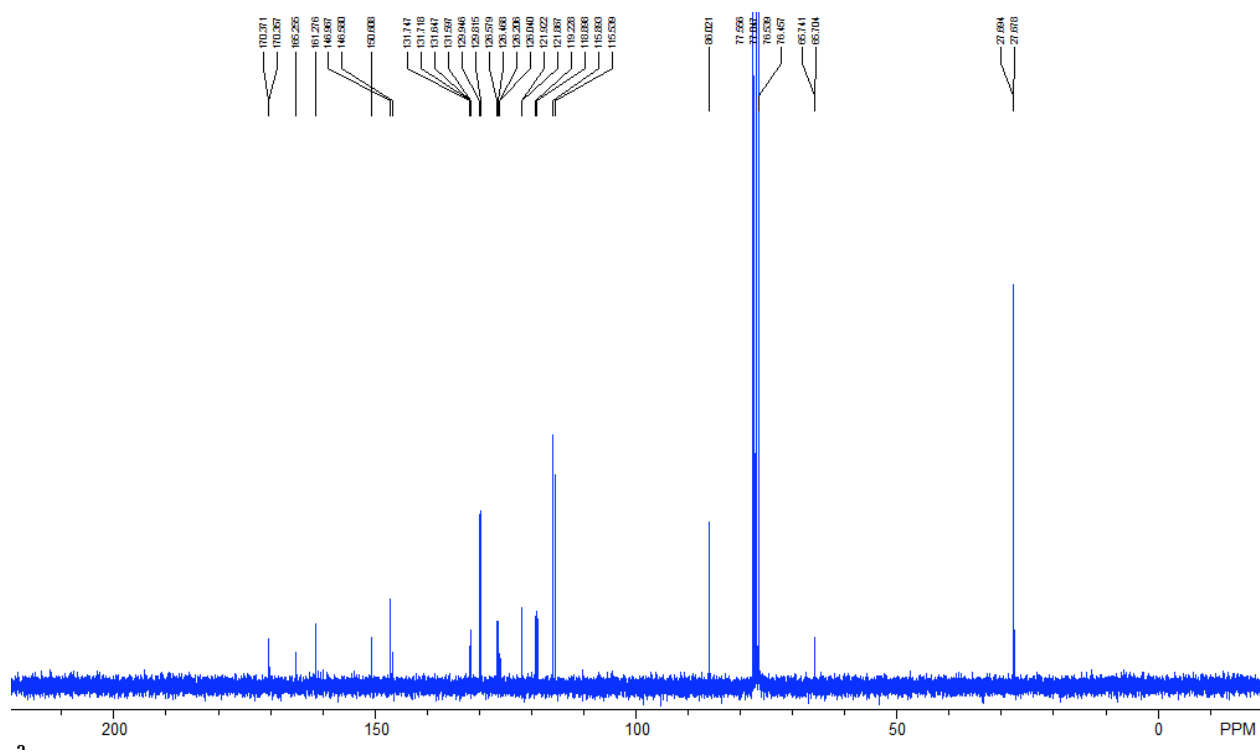



<sup>1</sup>H NMR of Compound **2k**

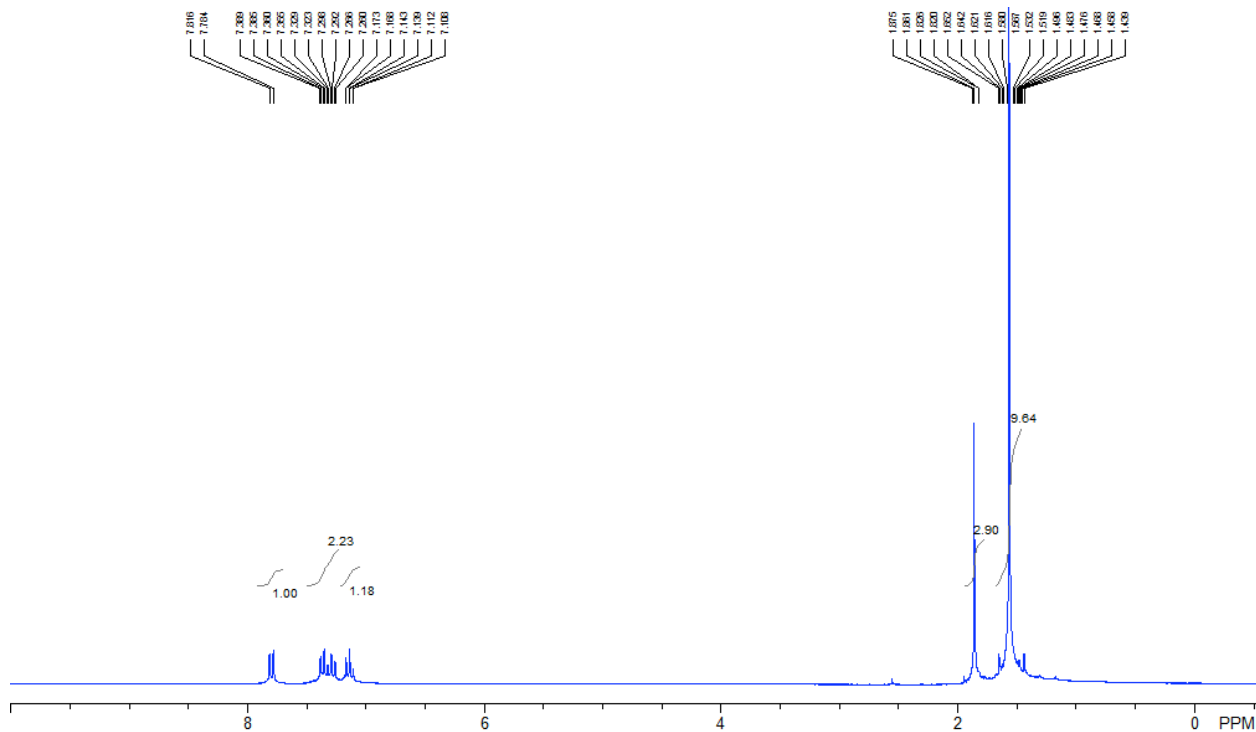

<sup>13</sup>C NMR of Compound **2k**

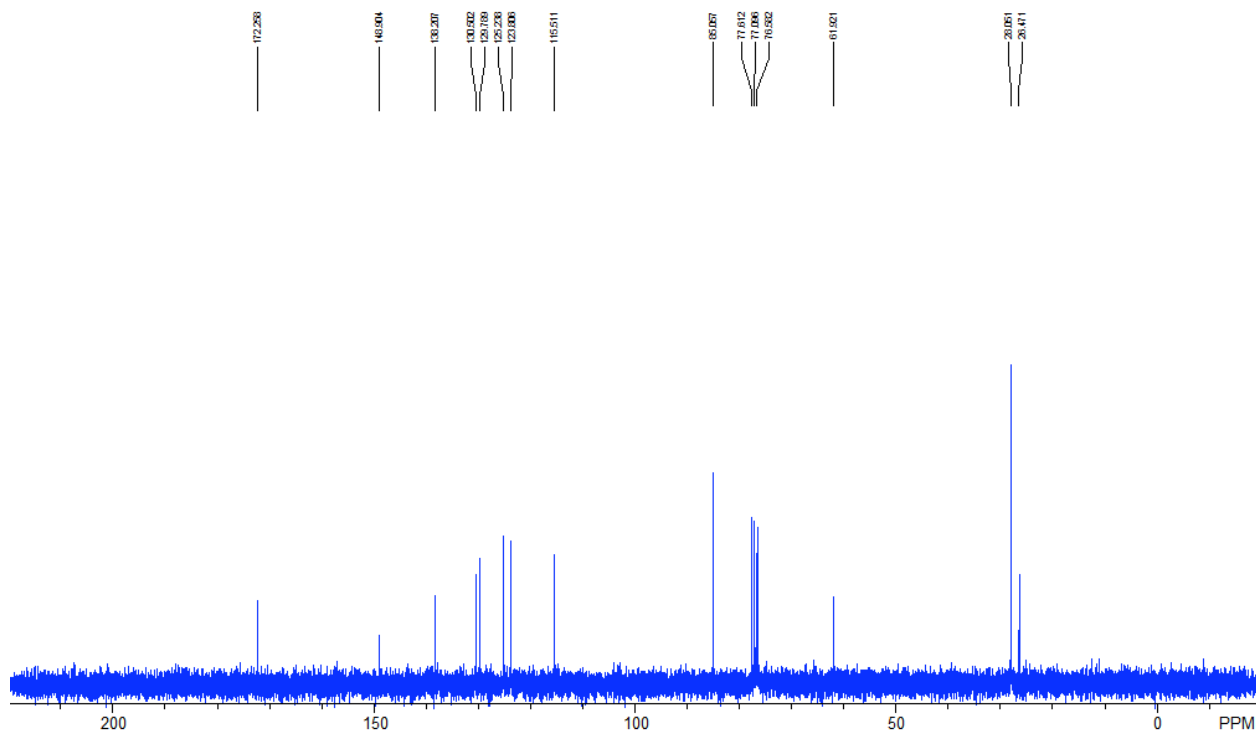

# <sup>1</sup>H NMR for compound 21

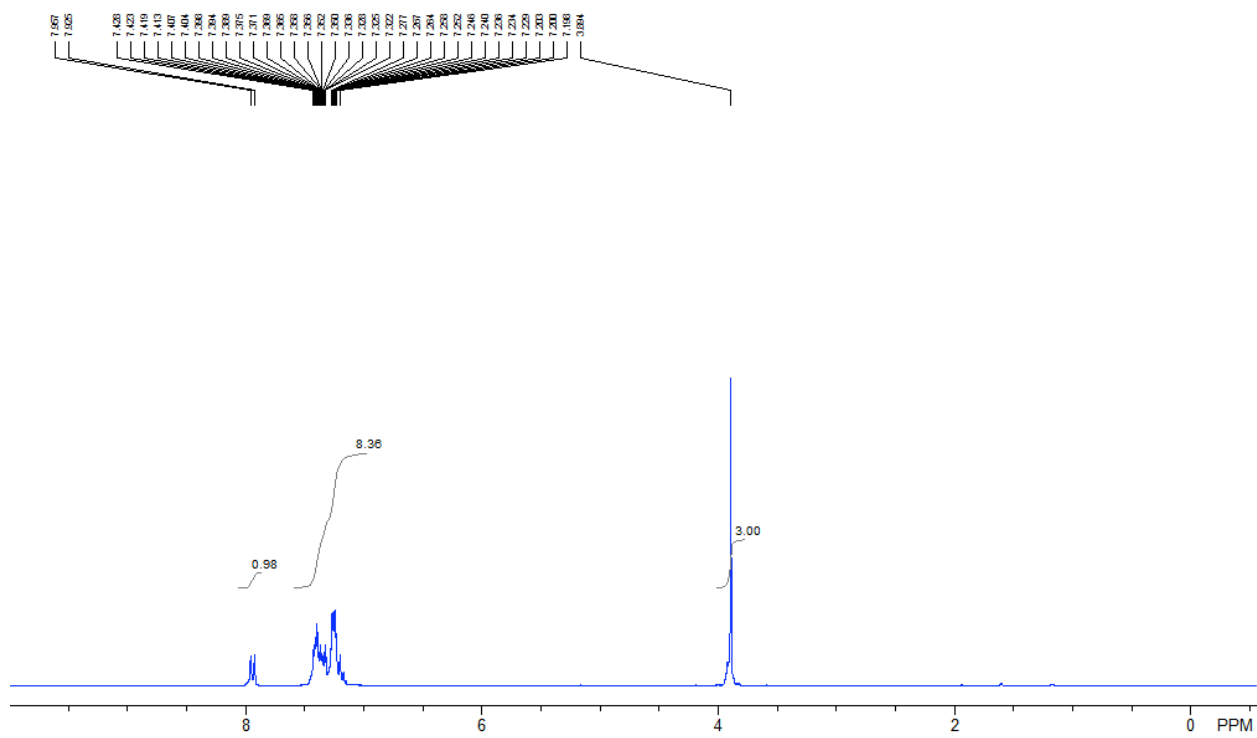

# <sup>13</sup>C NMR of Compound 21

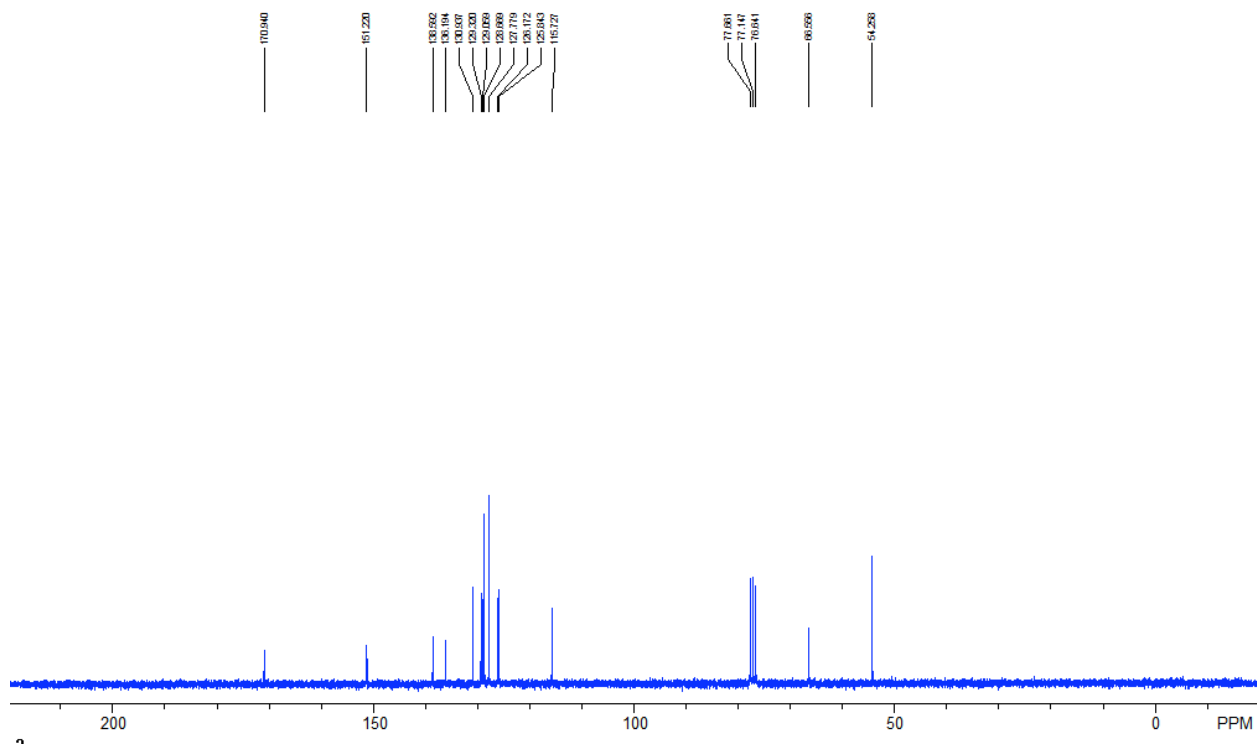

<sup>1</sup>H NMR for compound **3a**

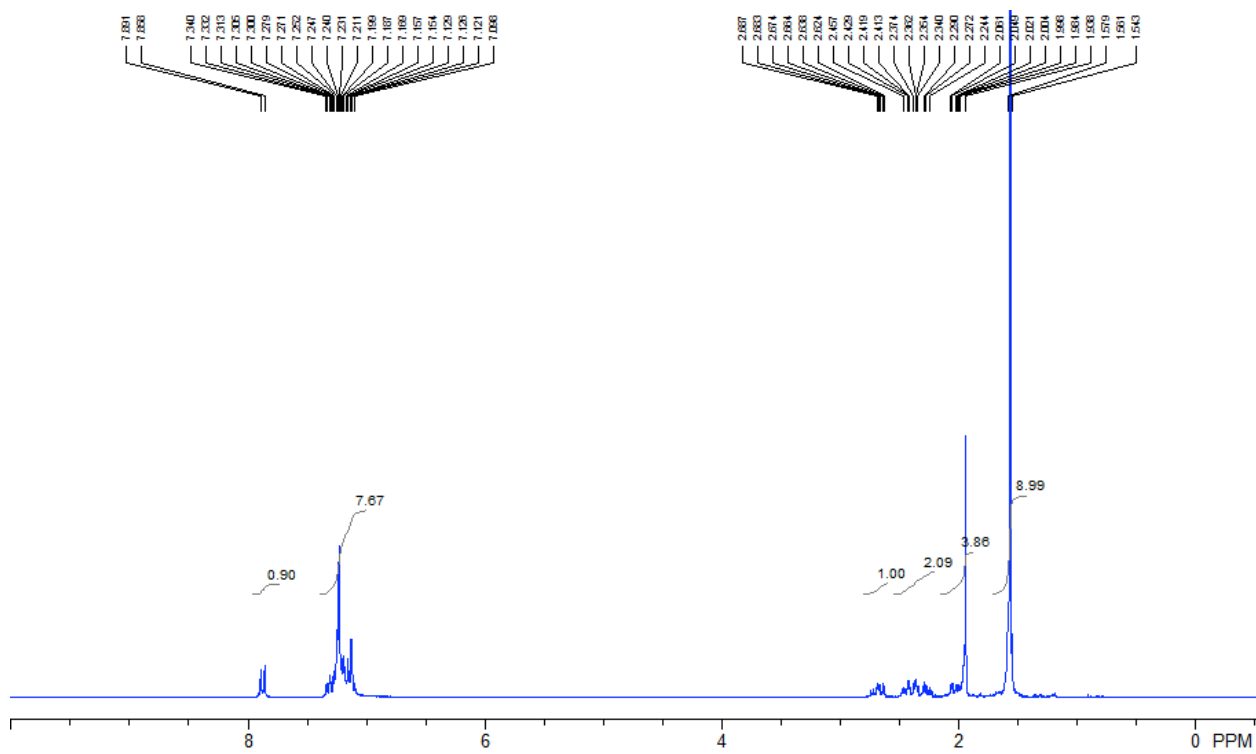

<sup>1</sup>H NMR for compound **3b**

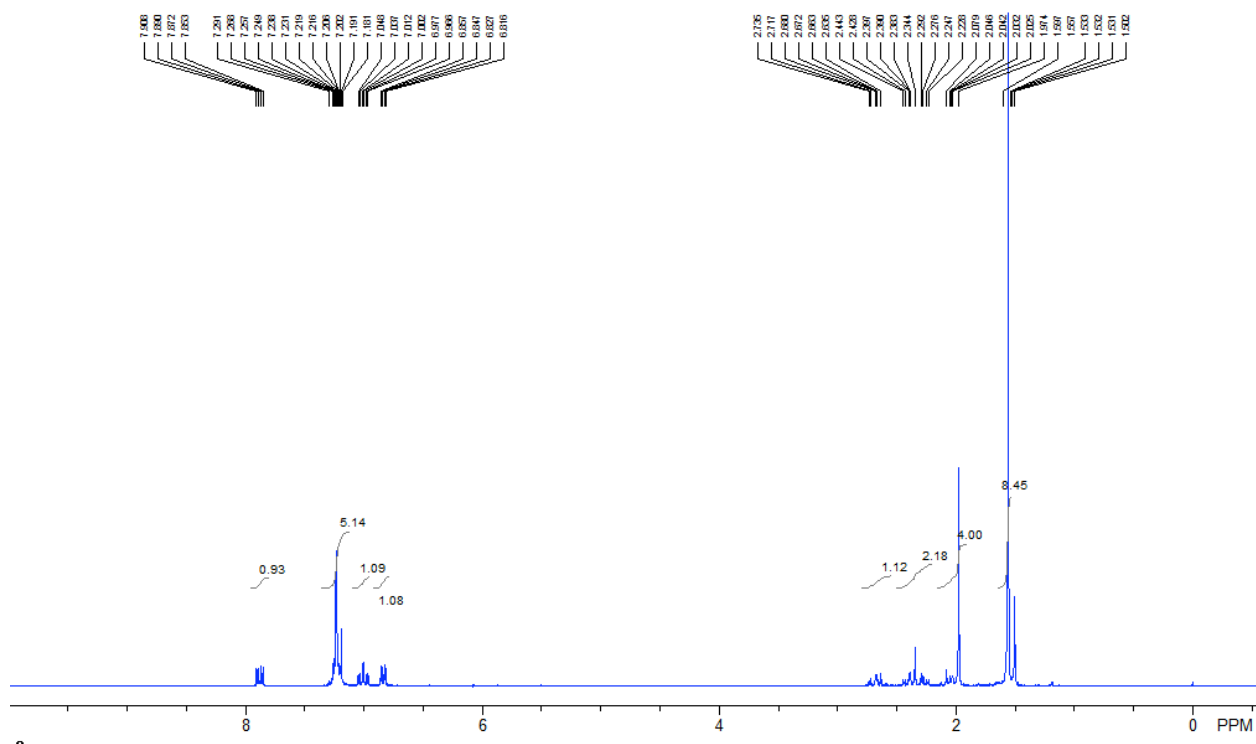

Supplement: NIHMS275447-supplement-1_si_001.pdf [file NIHMS275447-supplement-1_si_001.pdf]
